# Supplementary material
Source: ML conference proceedings conference paper supplement (https://openreview.net/forum?id=UuhoYEaUhT)
Supplement: supplementary_material [file NeurIPS_2025_final_version.pdf › Supplementary materials for final version 12974/NeurIPS_2025_final_version.pdf]

---

# Unbalanced Optimal Total Variation Transport: A Theoretical Approach to Spatial Resource Allocation Problems

---

**Nhan-Phu Chung\***  
Institute of Applied Mathematics  
University of Economics Ho Chi Minh City  
phucn@ueh.edu.vn

**Jinhui Han\***  
Guanghua School of Management  
Peking University  
jinhui.han@gsm.pku.edu.cn

**Bohan Li\***  
Center for Financial Engineering  
Soochow University  
bhli@suda.edu.cn

**Zehao Li\*<sup>†</sup>**  
Guanghua School of Management  
Peking University  
zehaoli@stu.pku.edu.cn

## Abstract

We propose and analyze a new class of unbalanced weak optimal transport (OT) problems with total variation penalties, motivated by spatial resource allocation tasks. Unlike classical OT, our framework accommodates general unbalanced non-negative measures and incorporates cost objectives that directly capture operational trade-offs between transport cost and supply–demand mismatch. In the general setting, we establish the existence of optimal solutions and a dual formulation. We then focus on the semi-discrete setting, where one measure is discrete and the other is absolutely continuous, a structure relevant to applications such as service area partitioning for facilities like schools or medical stations. Exploiting a tessellation-based structure, we derive the corresponding explicit optimality conditions. We further address a quantization problem that jointly optimizes the locations and weights of discrete support points, applicable to facility location tasks such as the cost-efficient deployment of battery swap stations or e-commerce warehouses, informed by demand-side data. The dual-tessellation structure also yields explicit gradient expressions, enabling efficient numerical optimization in finite dimensions.

## 1 Introduction

Optimal Transport (OT) provides a principled way to compare and transform probability measures by reallocating mass at minimal cost, as determined by a ground metric. Its sensitivity to distributional geometry and capacity to interpolate between measures have made OT a central tool in machine learning, statistics, and applied mathematics [51]. Applications span generative modeling [6, 18, 21], domain adaptation [10, 16, 23, 28], robust statistics [45, 46], clustering [35], image and shape processing [49, 59], graph matching [29], stochastic dynamics [66], and posterior inference [30].

Classical OT enforces strict mass conservation, which is often impractical in real-world scenarios due to noise, outliers, or domain mismatch [45, 58]. Unbalanced OT (UOT) addresses this limitation by relaxing marginal constraints through penalty functions [42, 43]. Various penalties have been

---

\*Equal-contribution authorship listed in alphabetical order.

<sup>†</sup>Corresponding author.

introduced to accommodate different applications, such as Kullback–Leibler (KL) divergence [20, 43],  $f$ -divergences [43],  $\chi^2$ -divergence [10], and total variation (TV) [45, 53, 54, 62]. Correspondingly, a range of computational strategies have been developed, including regression-based approaches [17], generalized Sinkhorn algorithms [20, 52], low-rank solvers [57], and GAN-based methods [65]. Despite these advances, the theoretical foundations of UOT under non-superlinear penalties, particularly TV, remain underdeveloped.

Meanwhile, the semi-discrete OT setting, where one marginal is continuous and the other discrete, has gained prominence in applications like autoencoders [5, 63] and GAN training [4]. Semi-discrete UOT further integrates this structure with mass imbalance, and has proven effective in tasks like quantization [15] and mode regularization in GANs [64]. In parallel, weak OT formulations generalize classical couplings by evaluating cost over disintegration of transport plans, allowing each source point to be matched with a probability distribution over the target space [2, 7, 19, 22]. This added flexibility enhances robustness to sampling noise and is particularly advantageous in settings where empirical distributions render classical couplings unstable [3, 8, 29].

In this paper, motivated by spatial resource allocation problems, we study a new class of unbalanced weak OT problems with total variation penalties. Unlike smoother, superlinear divergences studied in existing theory, TV-based penalties are piecewise linear and less smooth, posing substantial analytical challenges. Our work advances the theory of OT by developing a rigorous framework for this more general and practically motivated setting.

### Our Contributions.

- **A novel UOT formulation.** We propose the first formulation of *semi-discrete, unbalanced weak optimal transport with total variation penalties*, integrating weak couplings, mass imbalance, and non-superlinear regularization. This formulation is motivated by practical applications and introduces new mathematical structures.
- **Comprehensive theoretical results for TV-penalized UOT.** We establish the existence of optimal solutions and derive a dual formulation in the general setting. In the semi-discrete case, we develop a tessellation-based reformulation that reduces the infinite-dimensional problem to a finite-dimensional one, enabling explicit optimality conditions via Laguerre cell partitioning. Building on this, we further address an associated quantization problem. These results significantly extend and generalize classical entropy-regularized transport frameworks to the non-smooth, TV-penalized regime.
- **Practical significance.** Our theoretical framework captures key features of real-world problems, including semi-discrete geometry, mass imbalance, TV-type regularization, and probabilistic routing. In the semi-discrete regime, the induced dual-tessellation structure and explicit gradient expressions enable efficient optimization, which we demonstrate through two illustrative applications: *supply area division* and *spatial resource allocation*.

### Related Work.

From a theoretical standpoint, recent work has significantly advanced the understanding of OT under classical assumptions and various extensions [12, 25, 26, 31, 36, 44, 47, 56]. Among these, Pooladian et al. [55] investigate the semi-discrete OT problem with entropic regularization, followed by Agarwal et al. [1], which develops a combinatorial algorithm for the same setting. Theoretical analysis of UOT has also emerged, although much of the focus has been on algorithmic convergence and scalability rather than fundamental properties of the UOT problem itself [14, 24, 52, 60, 66]. A notable exception is the work of Bourne et al. [15], which addresses semi-discrete UOT with smooth entropy-based penalties. Besides, weak OT has received growing attention [9, 38]. Chung and Trinh [22] develop a general duality theory for weak optimal entropy transport under superlinear convex penalties. Most recently, Beiglböck et al. [11] extend strong duality results to weak OT with nonlinear cost functions, establishing a fundamental theorem for weak OT.

## 2 An unbalanced weak optimal total variation transport problem

### 2.1 Background on optimal transport and its generalizations

Rooted in the seminal work of Monge and Kantorovich, the classical OT problem seeks the most cost-efficient plan to transport mass from a source distribution  $\mu_1$  on  $X_1$  to a target distribution  $\mu_2$  on

$X_2$  under a prescribed cost function  $c(x_1, x_2)$ . Formally, it solves

$$\min_{\pi \in \Pi(\mu_1, \mu_2)} \int_{X_1 \times X_2} c(x_1, x_2) d\pi(x_1, x_2),$$

where  $\Pi(\mu_1, \mu_2)$  denotes the set of couplings with marginals  $\mu_1$  and  $\mu_2$ . To better accommodate various practical needs, several generalizations of OT have been proposed. Two important directions include *weak OT*, which relaxes the requirement of exact target marginal matching, and *entropy-regularized UOT*, which allows for mass variation while promoting smoother solutions. These extensions have proven particularly valuable in real-world applications, where strict mass conservation or exact marginal fidelity is either infeasible or undesirable.

**Weak OT.** The weak OT framework replaces the hard constraint of matching the target distribution exactly with a more relaxed, aggregate matching condition, typically through expectations or barycentric projections. A representative formulation is:

$$\min_{\pi \in \Pi(\mu_1, \mu_2)} \int_{X_1} C(x_1, \pi_{x_1}) \mu_1(dx_1),$$

where  $(\pi_{x_1})_{x_1 \in X_1}$  denotes the disintegration of the coupling  $\pi$  with respect to its first margin. Here, the cost function changes to  $C : X_1 \times \mathcal{P}(X_2) \rightarrow \mathbb{R} \cup \{+\infty\}$ , where  $\mathcal{P}(X)$  represents the space of probability measures on  $X$ . Notably, the classical OT formulation is recovered as a special case when  $C(x, p) := \int c(x, y) dp(y)$  for a base point-to-point cost  $c$  [2, 8, 32]. Weak OT approach proves particularly useful when the target measure  $\mu_2$  is only partially observed or known with uncertainty, a common situation in learning systems built on finite data. Compared to the rigid structure of classical OT, the weak formulation enhances stability and robustness in the learned transport plan. Furthermore, with suitable convexity properties, weak OT problems remain computationally tractable and well-suited for integration into learning pipelines.

**Entropy-Regularized UOT.** Another prominent extension is entropy-regularized UOT, which combines the benefits of entropic smoothing with the ability to handle measures of *unequal* total mass. This variant modifies the classical formulation by relaxing marginal constraints and penalizing deviations using divergence terms. A typical formulation, following [43], is

$$\inf_{\gamma \in \mathcal{M}(X_1 \times X_2)} \sum_{i=1}^2 \mathcal{F}_i(\gamma_i | \mu_i) + \int_{X_1 \times X_2} c(x_1, x_2) d\gamma(x_1, x_2),$$

where  $\mathcal{M}(X)$  denotes the space of nonnegative finite Borel measures, and  $\gamma_i$  is the margin of the transport plan  $\gamma$  on  $X_i$ . In contrast to classical OT, the plan  $\gamma$  is not constrained to be a coupling, and the input measures  $\mu_1$  and  $\mu_2$  need not have equal total mass. The functions  $\mathcal{F}_i$  typically encode divergences such as the KL divergence, thereby penalizing deviation from the prescribed marginals. Intuitively, although perfect mass preservation is inherently unattainable in the unbalanced setting, the resulting formulation aims to strike a balance between minimizing transport cost and permitting controlled deviations from marginal consistency. The entropic terms enhance smoothness and yield strongly convex objectives, enabling fast convergence of iterative solvers such as generalized Sinkhorn algorithms [20, 52]. Notably, the classical OT problem is recovered as a limiting case when both input measures are probability distributions and the penalization for any deviation is infinite.

## 2.2 Our considered problem

In many decision-centric tasks, particularly those arising in operational and resource-constrained environments, the cost of deviating from a desired distribution cannot be adequately captured by standard divergence-based penalties. Although statistical divergences such as the KL divergence are inherently asymmetric, their asymmetry does not generally reflect the directional economic or operational significance observed in real-world applications. For example, under-supplying a resource (e.g., understocking inventory or under-allocating service capacity) typically incurs substantially higher costs than over-supplying, due to lost sales, service failures, or unmet demand. More importantly, classical divergence measures quantify statistical dissimilarity without conveying explicit physical meaning or cost implications, limiting their interpretability in applied settings such as supply-demand matching and resource allocation.

To address this gap, we propose an unbalanced weak optimal total variation transport problem that replaces statistical divergence penalties with a newsvendor-type loss function, a cost model well-established in inventory management and economics [34, 37, 50]. The newsvendor loss offers a

parsimonious yet expressive way of modeling asymmetric penalties by assigning distinct weights to overestimation and underestimation. Its piecewise linear form directly reflects the real-world mismatch level, providing a physically meaningful and interpretable objective that aligns with the goals of many resource allocation problems [33, 67]. We consider the following optimization problem: for nonnegative vectors  $\mathbf{k}_1 = (a_1, b_1)$  and  $\mathbf{k}_2 = (a_2, b_2)$ ,  $\mu_1 \in \mathcal{M}(X_1)$ ,  $\mu_2 \in \mathcal{M}(X_2)$ , and  $\gamma \in \mathcal{M}(X_1 \times X_2)$ ,

$$\mathcal{E}_C^{\mathbf{k}_1, \mathbf{k}_2}(\mu_1, \mu_2) := \inf_{\gamma \in \mathcal{M}(X_1 \times X_2)} \text{ET}_C^{\mathbf{k}_1, \mathbf{k}_2}(\gamma | \mu_1, \mu_2), \quad (1)$$

where

$$\begin{aligned} \text{ET}_C^{\mathbf{k}_1, \mathbf{k}_2}(\gamma | \mu_1, \mu_2) := & a_1 |(\mu_1 - \gamma_1)^+| + b_1 |(\gamma_1 - \mu_1)^+| + a_2 |(\mu_2 - \gamma_2)^+| + b_2 |(\gamma_2 - \mu_2)^+| \\ & + \int_{X_1} C(x_1, \gamma_{x_1}) d\gamma_1(x_1), \end{aligned}$$

with  $\gamma_1$  and  $\gamma_2$  denoting the marginals of  $\gamma$ , and  $(\gamma_{x_1})_{x_1 \in X_1}$  being the disintegration of  $\gamma$  with respect to its first marginal. Here, for a scalar or measurable function  $g$ , we set  $g^+ := \max\{g, 0\}$ , while for a signed measure  $\nu$ , we take  $\nu^+$  to be the positive variation in the Jordan decomposition  $\nu := \nu^+ + \nu^-$  with  $\nu^+ \geq 0$ ,  $\nu^- \geq 0$ , and  $\nu^+ \perp \nu^-$ . When interpreted through the lens of supply-demand matching, the objective function offers a clear economic interpretation. The first two terms penalize supply-side mismatches: shortages are penalized at rate  $b_1$ , while excess supply incurs cost  $a_1$ . The next two terms represent demand-side penalties: lost demand due to undersupply is penalized at rate  $a_2$ , whereas overprovision relative to demand incurs cost  $b_2$ . When all weights are set to one, the objective corresponds to the TV distance between marginals and has been applied in prior work, such as [68].

Following the introduction in Section 2.1, the considered weak formulation can reduce to a normal case by choosing  $C(x_1, p) = k \int_{X_2} c(x_1, x_2) dp(x_2)$  for some point-to-point function  $c : X_1 \times X_2 \rightarrow (-\infty, +\infty]$ . This choice leads to a special case of entropy-regularized UOT studied in [43]:

$$\mathcal{E}^{\mathbf{k}_1, \mathbf{k}_2, k}(\mu_1, \mu_2) := \inf_{\gamma \in \mathcal{M}(X_1 \times X_2)} \text{ET}^{\mathbf{k}_1, \mathbf{k}_2, k}(\gamma | \mu_1, \mu_2), \quad (2)$$

where

$$\begin{aligned} \text{ET}^{\mathbf{k}_1, \mathbf{k}_2, k}(\gamma | \mu_1, \mu_2) := & a_1 |(\mu_1 - \gamma_1)^+| + b_1 |(\gamma_1 - \mu_1)^+| + a_2 |(\mu_2 - \gamma_2)^+| + b_2 |(\gamma_2 - \mu_2)^+| \\ & + k \int_{X_1 \times X_2} c(x_1, x_2) d\gamma(x_1, x_2), \end{aligned}$$

where the nonnegative constant  $k$  serves to rescale the transportation cost, reflecting the relative importance between transport and mismatch costs. While technically it can be absorbed into the definition of the cost function  $c$ , keeping it explicit highlights the application-dependent trade-off.

**Definition 2.1.** *We say that the problem (1) (resp. (2)) is feasible if there exists a transport plan  $\gamma \in \mathcal{M}(X_1 \times X_2)$  such that  $\text{ET}_C^{\mathbf{k}_1, \mathbf{k}_2}(\gamma | \mu_1, \mu_2) < \infty$  (resp.  $\text{ET}^{\mathbf{k}_1, \mathbf{k}_2, k}(\gamma | \mu_1, \mu_2) < \infty$ ).*

While our primary focus application is on resource allocation, we anticipate that the proposed unbalanced weak OT framework holds significant potential across a broader spectrum of applications. As discussed earlier, this setting represents one of the most expressive and versatile generalizations in OT theory. In particular, the weak formulation enables us to push the theory to its limits and includes classical OT as a special case. Beyond its generality, the weak formulation has shown promising practical advantages: by relaxing the coupling constraints, it enhances robustness to sampling noise and stability in empirical settings where exact couplings may not exist or may be sensitive to perturbations (see, e.g., [8, 29]). In this work, our objective is to establish a rigorous theoretical foundation for this framework, paving the way for its application in diverse decision-making and learning contexts.

**Example 2.1 (Order dispatching in ride-sourcing platforms).** [68] considers an order dispatching problem in ride-sourcing platforms, where the objective is to assign idle vehicles to meet customer demand across different locations. To simultaneously account for transportation cost and supply-demand mismatches, both of which directly affect platform efficiency and profitability, the authors propose a formulation that can be viewed as a special instance of the model in (2). In their context, problem-specific constraints are imposed to reflect practical considerations, such as a fixed supply-side marginal to represent the limited number of available drivers.

**Remark 2.1.** *Recasting resource allocation problems as an unbalanced weak OT framework provides several theoretical and practical advantages. First, the OT formulation is geometrically expressive. By embedding the problem in a metric space, it naturally captures spatial relationships through structures such as Laguerre and Voronoi tessellations—features that are difficult to obtain from purely algebraic linear programming (LP) models. This geometric perspective is not only mathematically elegant but also supports practical applications, such as service-area partitioning for facilities like fire stations or warehouses. Second, OT allows a natural treatment of imbalance through TV penalties, which directly quantify the cost of mass creation or deletion. This yields an explicit trade-off between transportation and mismatch costs, avoiding artificial slack variables often used in LP formulations. The magnitude of the TV term provides an intuitive measure of over- or under-supply. Third, the continuous formulation greatly enhances scalability, particularly in semi-discrete formulation, as it avoids high-dimensional LP formulations by reducing the optimization to a weight vector whose size matches the number of facilities. Overall, the OT-based approach offers a geometrically faithful, imbalance-aware, and efficient modeling framework. While LP methods remain convenient for direct implementation, we believe the structure, interpretability, and flexibility of the OT perspective provide substantial benefits.*

### 3 Main theoretical results

In this section, we present our main theoretical contributions, which are organized into three key components. First, in Section 3.1, we derive a dual formulation for the unbalanced weak optimal total variation transport problem (1). This dual characterization serves as a foundational tool for establishing optimality conditions and facilitates both analysis and computation. We then turn our attention to the semi-discrete setting in Sections 3.2 and 3.3, where one marginal is a discrete measure and the other is absolutely continuous with respect to the Lebesgue measure. This setting is motivated by practical applications in spatial resource allocation, including (1) service area partitioning, where one seeks to determine the optimal service regions of facilities such as medical stations or schools, and (2) facility location problems, such as the placement of battery swap stations or e-commerce warehouses. Specifically, Section 3.2 establishes optimality conditions for the semi-discrete transport problem, while Section 3.3 addresses a quantization problem in which both the weights and locations of the discrete marginal are jointly optimized to minimize the total transport cost.

#### 3.1 A dual formulation of weak optimal total variation transport

We first introduce some technical notations. For a metric space  $X$ , we denote by  $C_b(X)$  and  $B(X)$  the space of bounded continuous real functions and Borel real functions on  $X$ , respectively. A metric space  $X$  is *Polish* if it is complete and separable.

**Definition 3.1.** *We say that a measurable map  $C : X_1 \times \mathcal{P}(X_2) \rightarrow (-\infty, +\infty]$  has property (T) if for every  $M > 0$  and every sequence  $\{\gamma^n\}_{n \in \mathbb{N}} \subset \mathcal{M}(X_1 \times X_2)$  such that  $\int_{X_1} C(x_1, \gamma^n_{x_1}) d\gamma^n_1(x_1) \leq M$  for all  $n \in \mathbb{N}$ , the sequence  $\{\gamma^n\}_{n \in \mathbb{N}}$  is tight.*

Let  $X_1, X_2$  be Polish metric spaces, and let  $C : X_1 \times \mathcal{P}(X_2) \rightarrow (-\infty, +\infty]$  be a lower semicontinuous function that is bounded from below and satisfies property (T) as defined in Definition 3.1. These assumptions on  $C$  are nearly *minimal* and encompass commonly used cost functions as special cases. Assume further that  $(b_1 + b_2)/2 + \inf C > 0$ . Before proceeding to duality and optimality conditions, it is essential to establish that the unbalanced weak OT problem (1) admits a solution. The following theorem guarantees the existence of an optimal transport plan under these mild conditions.

**Theorem 3.1 (Existence of optimal solutions).** *Let  $\mu_i \in \mathcal{M}(X_i)$ , for  $i = 1, 2$  and suppose that problem (1) is feasible. Then the problem (1) has at least one optimal plan.*

We now proceed to derive the dual formulation of the primal problem (1), which, as previously noted, constitutes a critical intermediate step in our theoretical development. To elucidate the geometric role of the TV penalty in the weak formulation, we begin by introducing a family of auxiliary functions  $I_i$  and  $J_i$  for  $i = 1, 2$ , along with the corresponding admissible function classes  $\Phi_I$  and  $\Phi_J$ . These constructions will be used in the strong duality result presented in Theorem 3.2.

For each  $i = 1, 2$ , we define the functions  $I_i : \mathbb{R} \rightarrow (-\infty, +\infty]$  by

$$\begin{aligned} I_1(\varphi) &:= \inf_{s \geq 0} (s\varphi + a_1(1-s)^+ + b_1(s-1)^+) = a_1 \mathbf{1}_{\{\varphi > a_1\}} + \varphi \mathbf{1}_{\{-b_1 \leq \varphi \leq a_1\}} - \infty \mathbf{1}_{\{\varphi < -b_1\}}, \\ I_2(\varphi) &:= \inf_{s \geq 0} (s\varphi + a_2(1-s)^+ + b_2(s-1)^+) = a_2 \mathbf{1}_{\{\varphi > a_2\}} + \varphi \mathbf{1}_{\{-b_2 \leq \varphi \leq a_2\}} - \infty \mathbf{1}_{\{\varphi < -b_2\}}. \end{aligned} \quad (3)$$

Likewise, we define the conjugate-type functions  $J_i : \mathbb{R} \rightarrow (-\infty, +\infty]$  by

$$\begin{aligned} J_1(\phi) &= \sup_{s > 0} \frac{\phi - a_1(1-s)^+ - b_1(s-1)^+}{s} = +\infty \mathbf{1}_{\{\phi > a_1\}} + \phi \mathbf{1}_{\{-b_1 \leq \phi \leq a_1\}} - b_1 \mathbf{1}_{\{\phi < -b_1\}}, \\ J_2(\phi) &= \sup_{s > 0} \frac{\phi - a_2(1-s)^+ - b_2(s-1)^+}{s} = +\infty \mathbf{1}_{\{\phi > a_2\}} + \phi \mathbf{1}_{\{-b_2 \leq \phi \leq a_2\}} - b_2 \mathbf{1}_{\{\phi < -b_2\}}. \end{aligned}$$

Using these functions, we define two sets of admissible test functions:

$$\Phi_I := \{(\varphi_1, \varphi_2) \in C_b(X_1) \times C_b(X_2) : -b_1 \leq \varphi_1(x_1), -b_2 \leq \varphi_2(x_2) \text{ for every } x_i \in X_i, i = 1, 2 \text{ and } \varphi_1(x_1) + p(\varphi_2) \leq C(x_1, p) \text{ for every } x_1 \in X_1, p \in \mathcal{P}(X_2)\},$$

$$\Phi_J := \{(\varphi_1, \varphi_2) \in C_b(X_1) \times C_b(X_2) : \varphi_1(x_1) \leq a_1, \varphi_2(x_2) \leq a_2 \text{ for every } x_i \in X_i, i = 1, 2 \text{ and } J_1(\varphi_1(x_1)) + p(J_2(\varphi_2)) \leq C(x_1, p) \text{ for every } x_1 \in X_1, p \in \mathcal{P}(X_2)\}.$$

**Theorem 3.2 (Dual representation).** *Suppose that for every  $x_1 \in X_1$ ,  $C(x_1, \cdot) : \mathcal{P}(X_2) \rightarrow (-\infty, +\infty]$  is convex. Then for every  $\mu_i \in \mathcal{M}(X_i), i = 1, 2$ , we have*

$$\mathcal{E}_C^{\mathbf{k}_1, \mathbf{k}_2}(\mu_1, \mu_2) = \sup_{(\varphi_1, \varphi_2) \in \Phi_J} \sum_{i=1}^2 \int_{X_i} \varphi_i d\mu_i = \sup_{(\varphi_1, \varphi_2) \in \Phi_I} \sum_{i=1}^2 \int_{X_i} I_i(\varphi_i(x_i)) d\mu_i(x_i).$$

**Remark 3.1.** *A similar dual representation has been established in the case where both  $X_1$  and  $X_2$  are compact [22, Theorem 2]. Extending this result to general (non-compact) spaces, however, is nontrivial, primarily due to the presence of non-superlinear, newsvendor-type penalties, which are motivated by practical considerations. In this work, we adopt a different proof strategy from that used in [22, Theorem 2] to accommodate these challenges.*

Such a dual perspective plays a central role in the modern development and application of OT theory, owing to both its theoretical and practical advantages. On the theoretical side, the dual formulation provides essential structural insights, such as the characterization of optimal plans through Kantorovich potentials  $(\varphi_1, \varphi_2)$  and the derivation of necessary and sufficient conditions for optimality. On the practical side, it often leads to more computationally tractable formulations. Notably, the dual representation established in Theorem 3.2 is very general, and it partially recovers [43, Corollary 4.12] when  $C(x_1, p) = k \int c(x_1, x_2) dp$  and the entropy functions are given by  $F_i = a_i(1-s)^+ + b_i(s-1)^+, i = 1, 2$ , as stated in the following corollary.

**Corollary 3.1.** *Let  $c : X_1 \times X_2 \rightarrow (-\infty, +\infty]$  be a lower semicontinuous function that is bounded from below and has compact sublevels. Suppose that  $(b_1 + b_2)/2 + k \inf c > 0$ . Then, for every  $\mu_i \in \mathcal{M}(X_i), i = 1, 2$ , we have*

$$\mathcal{E}_c^{\mathbf{k}_1, \mathbf{k}_2, k}(\mu_1, \mu_2) = \sup_{(\varphi_1, \varphi_2) \in \Lambda_J} \sum_{i=1}^2 \int_{X_i} \varphi_i d\mu_i = \sup_{(\varphi_1, \varphi_2) \in \Lambda_I} \sum_{i=1}^2 \int_{X_i} I_i(\varphi_i(x_i)) d\mu_i(x_i),$$

where the admissible sets  $\Lambda_J$  and  $\Lambda_I$  are respectively defined as  $\Lambda_J := \{(\varphi_1, \varphi_2) \in C_b(X_1) \times C_b(X_2) : \varphi_1(x_1) \leq a_1, \varphi_2(x_2) \leq a_2, J_1(\varphi_1(x_1)) + J_2(\varphi_2(x_2)) \leq k \cdot c(x_1, x_2) \text{ for every } x_1 \in X_1, x_2 \in X_2\}$  and  $\Lambda_I := \{(\varphi_1, \varphi_2) \in C_b(X_1) \times C_b(X_2) : \varphi_1(x_1) \geq -b_1, \varphi_2(x_2) \geq -b_2, \varphi_1(x_1) + \varphi_2(x_2) \leq k \cdot c(x_1, x_2) \text{ for every } x_1 \in X_1, x_2 \in X_2\}$ .

In what follows, rather than deriving the optimality conditions directly under the general framework of Theorem 3.2, which is straightforward but offers limited intuitive insight, we shift our focus to more practically relevant semi-discrete settings. This allows for a clearer theoretical development and facilitates meaningful applications, particularly in the context of spatial resource allocation.

### 3.2 Semi-discrete unbalanced total variation transport

Here, we consider a semi-discrete scenario under the problem formulation (2), where the first marginal is continuous and the second marginal is discrete. Specifically, we let  $\mu_1 \in \mathcal{M}(X_1)$  be absolutely continuous with respect to the Lebesgue measure, and define  $\mu_2 = \sum_{i=1}^M m_i \delta_{y_i} \in \mathcal{M}(X_2)$  for some given integer  $M > 0$ , where  $\delta_{y_i}$  denotes the Dirac measure centered at  $y_i$ . Examples arising in spatial resource allocation, such as the placement of e-commerce warehouses or public facilities like schools, naturally fit within this framework. In such settings, the discrete points represent service stations (i.e., supply locations), while the continuous measure models the spatial distribution of service demand across the region. We first introduce several new notations or concepts that will be used later. For any  $a, b \in \mathbb{R}$ , we denote  $a \vee b := \max\{a, b\}$ . Let  $n > 0$  be any given integer, and let  $X_1$  and  $X_2$  be subsets of  $\mathbb{R}^n$ . Assume that  $(b_1 + b_2)/2 + k \inf c > 0$  and  $c$  has compact sublevels. In both Sections 3.2 and 3.3, we further assume that  $c$  is *radial* according to the following definition (see also [15]).

**Definition 3.2.** A function  $c : X_1 \times X_2 \rightarrow (-\infty, +\infty]$  is *radial* if it can be written as  $c(x, y) = g(d(x, y))$  with a continuous, strictly increasing function  $g : [0, +\infty) \rightarrow [0, +\infty)$  satisfying  $g(0) = 0$ .

Beyond its practical significance, the semi-discrete setting is of theoretical interest due to the special geometric structure of its solutions. In particular, the optimal transport plan induces a cell decomposition of the domain, which is both mathematically elegant and operationally interpretable.

**Definition 3.3 (Generalized Laguerre cells, [15]).** Given a transportation cost  $c : X_1 \times X_2 \rightarrow (-\infty, +\infty]$  and  $y_1, \dots, y_M \in X_2$ , we define the generalized Laguerre cells corresponding to the weight vector  $w \in \mathbb{R}^M$  as follows: for  $i \in \{1, \dots, M\}$

$$C_i(w) = \{x \in X_1 \mid c(x, y_i) < +\infty, c(x, y_i) - w_i \leq c(x, y_j) - w_j \text{ for all } j \in \{1, \dots, M\}\}. \quad (4)$$

The residual set, denoted by  $R$ , is defined as  $R = \{x \in X_1 \mid c(x, y_i) = +\infty\}$ .

The next theorem recasts the dual functional from Theorem 3.2 as a finite-dimensional optimization over the weight vector  $w$  associated with the cell division, thereby reducing the original infinite-dimensional problem over Kantorovich potentials to a more tractable finite-dimensional setting.

**Theorem 3.3 (Dual tessellation formulation).** Suppose that problem (2) is feasible. Then

$$\mathcal{E}^{k_1, k_2, k}(\mu_1, \mu_2) = \sup \{ \mathcal{G}(w) \mid w = (w_1, \dots, w_M) \in [-b_2, +\infty)^M \}, \quad (5)$$

where

$$\begin{aligned} \mathcal{G}(w) &= \sum_{i=1}^M \int_{C_i(w)} I_1(-b_1 \vee [k \cdot c(x, y_i) - w_i]) d\mu_1(x) + a_1 \mu_1(R) + \sum_{i=1}^M I_2(w_i) m_i \\ &= \int_{\Omega \setminus R} I_1(c^w(x)) d\mu_1(x) + a_1 \mu_1(R) + \sum_{i=1}^M I_2(w_i) m_i \end{aligned} \quad (6)$$

with  $c^w : X_1 \rightarrow (-\infty, +\infty]$  defined by  $c^w(x) := -b_1 \vee \min_{i=1, \dots, M} \{k \cdot c(x, y_i) - w_i\}$ .

Equation (6) reveals that the reformulated dual objective  $\mathcal{G}$  admits an explicit and tractable dependence on the weight vector  $w$ , facilitating algorithm design for identifying the optimal weights. Building on Theorem 3.3, we now proceed to establish the corresponding optimality condition.

**Theorem 3.4 (Optimality conditions).** Suppose that  $X_2 = \{y_1, \dots, y_M\}$  and problem (2) is feasible. Let  $\gamma \in \mathcal{M}(X_1 \times X_2)$  be an optimizer for problem (2) and  $w = (w_1, \dots, w_M) \in [-b_2, +\infty)^M$  be an optimizer for problem (5). Then  $\gamma$  admits the form  $\gamma = \sum_{i=1}^M \eta_i \otimes \delta_{y_i}$  for  $\eta_i \in \mathcal{M}(X_1)$ ,  $i = 1, \dots, M$ . The Lebesgue decomposition of  $\gamma_1$  with respect to  $\mu_1$  is  $\gamma_1 = \sum_{i=1}^M \eta_i = \frac{d\gamma_1}{d\mu_1} \mu_1 + \gamma_1^\perp$ . Define  $S_1 := \{i \in \{1, \dots, M\} : m_i \neq 0\}$  and  $S_2 := \{i \in \{1, \dots, M\} : m_i = 0\}$ . Then the following conditions hold:

$$\eta_i = \gamma_1 \llcorner C_i(w) \text{ for every } i = 1, \dots, M \text{ (i.e., } \gamma = \sum_{i=1}^M \gamma_1 \llcorner C_i(w) \otimes \delta_{y_i}), \quad (7)$$

where  $\gamma_1 \llcorner C_i(w)$  denotes the restriction of  $\gamma_1$  to the cell  $C_i(w)$ , and

$$\frac{d\gamma_1}{d\mu_1}(x) = 1 \text{ for } \mu_1\text{-a.e. } x \in X_1 \setminus R, \quad \frac{d\gamma_1}{d\mu_1}(x) = 0 \text{ for } \mu_1\text{-a.e. } x \in R, \quad (8)$$

$$|\eta_i| = m_i \text{ for all } i \in S_1, \quad c^w(x) = -b_1 \text{ for } \gamma_1^\perp\text{-a.e. } x \in X_1 \setminus R, \quad (9)$$

$$w_i = -b_2 \text{ for every } i \in S_2. \quad (10)$$

Conversely, if  $\gamma$  and  $w$  satisfy (7-10), then they are optimal solutions to (2) and (5), respectively.

The first marginal of the optimal transport plan comprises two components: an absolutely continuous part with respect to the input marginal  $\mu_1$ , and a singular part that arises due to the piecewise-linear TV penalty, which differs from [15]. In particular, the optimality conditions established in Theorem 3.4 enable efficient recovery of the optimal transport plan once the optimal weight vector  $w^*$  has been determined. The latter can be computed using gradient-based methods, as the exact (sub-)gradient of the dual objective  $G(w)$  with respect to each  $w_i$  is explicitly available and presented below.

**Proposition 3.1 (Gradient of dual tessellation formulation).**  $\mathcal{G}$  defined in (6) from Theorem 3.3 is (sub-)differentiable with respect to each  $w_i$  and

$$\partial_{w_i} \mathcal{G}(w) = \begin{cases} -\mu_1(C_i(w) \cap \{x : k \cdot c(x, y_i) - w_i \in [-b_1, a_1]\}) + m_i, & w_i \in (-b_2, a_2), \\ -\mu_1(C_i(w) \cap \{x : k \cdot c(x, y_i) - w_i \in [-b_1, a_1]\}) + [0, m_i], & w_i \in \{a_2\}, \\ -\mu_1(C_i(w) \cap \{x : k \cdot c(x, y_i) - w_i \in [-b_1, a_1]\}), & w_i \in (a_2, +\infty). \end{cases}$$

**Remark 3.2.** It is clear that  $\mathcal{G}(w)$  is decreasing in  $w_i$  over  $(a_2, +\infty)$ . Therefore, for fixed values of  $\{w_j\}_{j \neq i}$ , the maximizer of (5) with respect to  $w_i$  must lie within the interval  $(-b_2, a_2]$ .

### 3.3 Optimal spatial resource allocation

In the previous subsection, both the locations and masses of the discrete measure were fixed, and the objective was to determine a service area partition. We now advance the analysis by formulating a quantization problem in which the locations and masses are jointly optimized to minimize the overall transport cost. This extension naturally connects to practical applications such as facility location and resource allocation. Specifically, we adopt a sequential optimization strategy: we first optimize the mass vector while holding the locations fixed, leveraging the optimality conditions established in Theorem 3.4, and subsequently update the locations to further reduce the aggregate loss.

**Theorem 3.5 (Optimal masses given locations).** Given fixed cardinality  $M$  and fixed support points  $y_1, \dots, y_M \in X_2$ , define

$$Q(y_1, \dots, y_M) := \min \left\{ \mathcal{E}^{k_1, k_2, k}(\mu_1, \mu_2) : \mu_2 = \sum_{i=1}^M m_i \delta_{y_i}, m_1, \dots, m_M > 0 \right\}, \quad (11)$$

where  $\mathcal{E}^{k_1, k_2, k}(\mu_1, \mu_2)$  is defined in (2) with  $\gamma$  runs over  $\mathcal{M}(X_1 \times \{y_1, \dots, y_M\})$ . Assume that  $\mu_1(C_i(\mathbf{0})) > 0$  for every  $i = 1, \dots, M$ , where  $\mathbf{0}$  is the  $M$ -dimensional zero vector. Then the minimizer of (11) is  $(m_1^*, \dots, m_M^*)$  satisfying  $m_i^* = \mu_1(C_i(\mathbf{0})) > 0$  for every  $i = 1, \dots, M$ . Moreover, we have

$$Q(y_1, \dots, y_M) = \sum_{i=1}^M \int_{C_i(\mathbf{0})} I_1(-b_1 \vee k \cdot c(x, y_i)) d\mu_1(x) + a_1 \mu_1(R). \quad (12)$$

To complete the quantization procedure, it remains to optimize over the locations of support points. Based on Theorem 3.5, this amounts to solving the following location optimization problem:

$$\min \{Q(y_1, \dots, y_M) : y_1, \dots, y_M \in X_2\},$$

where  $Q(y_1, \dots, y_M)$  is defined in (11). This optimization can be carried out efficiently using gradient-based methods [39, 40, 41], as the necessary gradients are derived and provided below.

**Proposition 3.2 (Gradient of quantization objective function).** Assume the cost function  $c : X_1 \times X_2 \rightarrow (-\infty, +\infty]$  is differentiable with respect to its second argument, and denote its gradient by  $\nabla_y c(x, y)$ . Assume that  $\mu_1(C_i(\mathbf{0})) > 0$  for every  $i = 1, \dots, M$ . Then, for each  $i = 1, \dots, M$ , the gradient of the quantization objective  $Q(y_1, \dots, y_M)$  with respect to  $y_i$  is given by

$$\nabla_{y_i} Q(y_1, \dots, y_M) = k \int_{C_i(\mathbf{0}) \cap \{x : k \cdot c(x, y_i) \in (-b_1, a_1]\}} \nabla_{y_i} c(x, y_i) d\mu_1(x).$$



## 4 Numerical examples and illustrative applications

Given our primary focus on establishing a rigorous theoretical framework and the space limitations, we illustrate the practical relevance of our results through two representative application scenarios with numerical examples. Further exploration of additional applications is left for future research.

### 4.1 Supply area division

We demonstrate the application of Section 3.2 through a spatial supply-area division problem. An urban planner must allocate  $m=4$  fixed emergency depots  $Y = \{y_i\}_{i=1}^m \subset [0, 1]^2$  to serve incident locations distributed continuously over  $X \subset [0, 1]^2$  with density  $\mu$ . The total incident mass is normalized to  $M_\mu = 1$ , while the available standby capacity is limited to  $M_\nu = 0.7$ , represented by the discrete measure  $\nu = \sum_{i=1}^m \nu_i \delta_{y_i}$ , with  $\sum_i \nu_i = 0.7$ . Travel cost is set to the Euclidean distance.

**Semi-discrete.** The demand distribution  $\mu$  is continuous, while supply is concentrated at finitely many depots ( $\nu$ ). The tessellation-based dual formulation thus applies directly.

**Unbalanced.** Since  $M_\mu \neq M_\nu$ , only a fraction of incidents can be served. The optimization identifies where to allocate supply and where to forgo service. We set  $\mu$  to be uniform and initialize  $\nu_i$  randomly.

**TV penalty.** Asymmetric newsvendor parameters are set to  $a_1 = 1$ ,  $b_1 = 0.5$ , and  $a_2 = b_2 = 0$ , penalizing undersupply at rate  $b_1$  and oversupply at rate  $a_1$ . We further let  $k = 1$ .

Proposition 3.1 provides the sub-gradient  $g_i(w) = \text{clip}_{[-b_1, a_1]}(\nu_i - \mu(C_i(w)))$ , which we use in gradient descent algorithms with decaying step size  $\alpha_t = \alpha_0(1+t)^{-\text{decay}}$ , where  $\alpha_0 = 0.05$  and  $\text{decay} = 0.6$ . The algorithm stops after 1000 iterations in 0.9 seconds. The final supply-area partition, determined by the optimized weights  $\{w_i\}_{i=1}^4$ , is shown in Figure 1. This example highlights the practicality of the dual formulation and subgradient structure from Section 3.2 in addressing semi-discrete, unbalanced, and asymmetrically penalized transport problems.

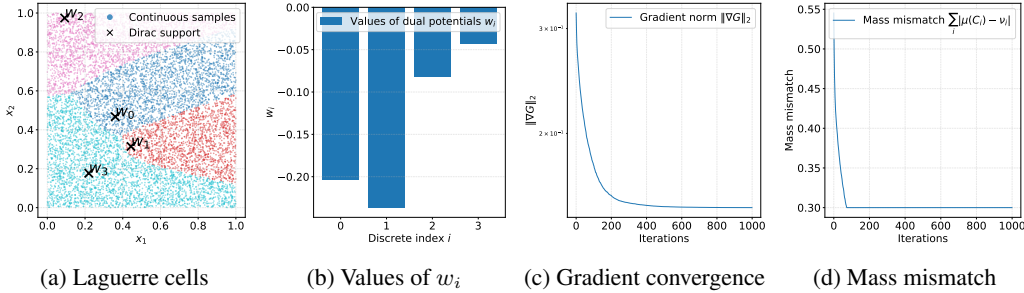

Figure 1: Fig. (a) displays the resulting supply-area partition, with black crosses indicating depot locations. Fig. (b) presents the learned dual weights  $w_i \in [-1, 1]$ . Figs. (c)–(d) plot the  $\ell_2$  norm of the gradient and the total mass mismatch  $\sum_i |\mu(C_i) - \nu_i|$ .

### 4.2 Spatial resource allocation

This experiment extends the previous example by endogenously selecting the depots, echoing Section 3.3. Specifically, we now optimize the positions  $Y = \{y_i\}_{i=1}^m \subset [0, 1]^2$  along with the dual weights  $w_i$ , and the optimal mass allocation is determined by Theorem 3.5. Each point  $x$  is assigned to the depot minimizing the effective cost  $z(x, i) = c(x, y_i) - w_i$ . If the minimal cost exceeds the threshold  $a_1$ , this point is assigned to the residual set  $R$ , incurring a penalty of  $a_1 \mu(R)$ . If a cell  $C_i(w) = \{x : z(x, i) \leq z(x, j), \forall j\}$  becomes empty, the corresponding weight is set to  $w_i = -b_2$ , effectively deactivating the facility. The resulting outer objective,  $Q(y) = \sum_i \int_{C_i(w^*)} z(x, i) d\mu(x) + a_1 \mu(R)$ , matches the form addressed in Theorem 3.5.

**Setting.** We sample  $N = 2000$  incident locations from a two-component Gaussian mixture with means  $(0.3, 0.3)$  and  $(0.7, 0.7)$ , and covariance  $0.02I_2$ . Samples are clipped to  $[0, 1]^2$  and rescaled to ensure  $M_\mu = 1$ . The number of depots is fixed at  $m = 4$ , with initial positions drawn i.i.d. from the uniform distribution on  $[0, 1]^2$ . Newsvendor parameters are set to  $a_1 = 0.3$ ,  $a_2 = 1$ ,  $b_1 = 0.1$ , and  $b_2 = 0.2$ . The choice of a smaller  $a_1$  encourages visible residual mass, while the ordering

$b_1 < b_2 < a_1$  conforms to the structure of the folded loss  $I_1$ . A decaying step size  $0.3/(1+t)^{0.6}$  is used. The CPU running time is 2.6 s, and the results shown in Figure 2 confirm that the outer–inner decomposition prescribed by Proposition 3.2 yields an effective gradient-based solver.

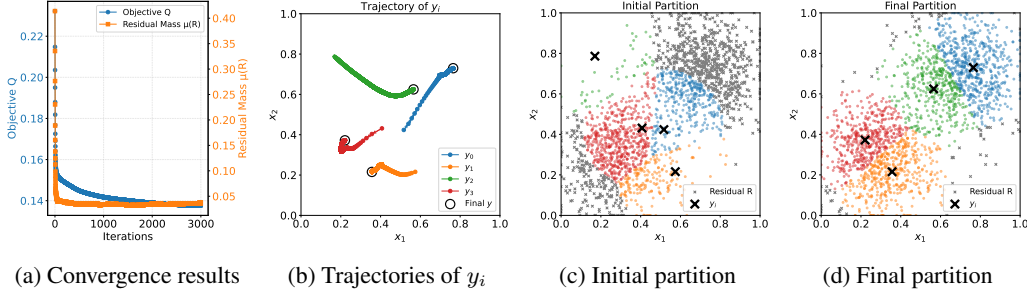

Figure 2: Fig. (a) plots the objective  $Q(y)$  (blue) and the residual mass  $\mu(R)$  (orange), which stabilizes around 0.05, indicating that approximately 5% of demand is optimally left unserved due to excessive transport cost. Fig. (b) illustrates the trajectories of the four depots: arrows trace movement from random initial positions toward demand clusters. In Fig. (c), the initial location of depots (black “x”) and the nearby demands partition the entire area into several distinct parts (in different colors), which resembles a Laguerre diagram. In this partition, the demands within each Laguerre cell are serviced by the depot of the same color. However, there are still areas with high-density demands (gray “x”) falling into the residual set  $R$ . After optimization, Fig. (d) shows four depots concentrating near high-density regions, while low-demand areas are absorbed into  $R$ , reflecting TV-induced saturation.

## 5 Conclusion and future work

This paper presents a comprehensive theoretical framework for unbalanced weak OT problems with total-variation penalties. We establish a general dual formulation that encompasses many existing models as special cases. We then focus on the semi-discrete setting, motivated by spatial resource allocation applications, and show that the problem admits a Laguerre tessellation structure. This allows for explicit optimality conditions and a next-level tractable quantization procedure. While our primary emphasis is on theoretical development, we include preliminary numerical examples to demonstrate the framework’s applicability. We anticipate that this foundation will support future extensions in both theory and practice.

## Acknowledgments and Disclosure of Funding

Nhan-Phu Chung is funded by University of Economics Ho Chi Minh City, Vietnam. Jinhui Han acknowledges financial support from the National Natural Science Foundation of China grant with Project “Data-Driven Operations Analytics Methods” and “The Fundamental Research Funds for the Central Universities, Peking University”. Bohan Li is supported by the National Natural Science Foundation of China under grant No. 12501661. The authors thank the anonymous reviewers for their comments.

## References

- [1] Pankaj Agarwal, Sharath Raghvendra, Pouyan Shirzadian, and Keegan Yao. A combinatorial algorithm for the semi-discrete optimal transport problem. *Advances in Neural Information Processing Systems*, 37:25857–25887, 2024.
- [2] J.-J. Alibert and T. Champion G. Bouchitté. A new class of costs for optimal transport planning. *European Journal of Applied Mathematics*, 30:1229 – 1263, 2019.
- [3] Jason M Altschuler, Jonathan Niles-Weed, and Austin J Stromme. Asymptotics for semidiscrete entropic optimal transport. *SIAM Journal on Mathematical Analysis*, 54(2):1718–1741, 2022.
- [4] Luca Ambrogioni, Umut Güçlü, and Marcel van Gerven. k-gans: Ensemble of generative models with semi-discrete optimal transport. *arXiv preprint arXiv:1907.04050*, 2019.

- [5] Dongsheng An, Yang Guo, Na Lei, Zhongxuan Luo, Shing-Tung Yau, and Xianfeng Gu. AE-OT: A new generative model based on extended semi-discrete optimal transport. *ICLR 2020*, 2019.
- [6] Martin Arjovsky, Soumith Chintala, and Léon Bottou. Wasserstein generative adversarial networks. In *International Conference on Machine Learning*, pages 214–223. PMLR, 2017.
- [7] Julio Backhoff-Veraguas, Mathias Beiglböck, and Gudmun Pammer. Existence, duality, and cyclical monotonicity for weak transport costs. *Calculus of Variations and Partial Differential Equations*, 58(6):203, 2019.
- [8] Julio Backhoff-Veraguas and Gudmund Pammer. Applications of weak transport theory. *Bernoulli*, 28(1):370–394, 2022.
- [9] Julio Backhoff-Veraguas and Gudmund Pammer. Stability of martingale optimal transport and weak optimal transport. *The Annals of Applied Probability*, 32(1):721–752, 2022.
- [10] Yogesh Balaji, Rama Chellappa, and Soheil Feizi. Robust optimal transport with applications in generative modeling and domain adaptation. *Advances in Neural Information Processing Systems*, 33:12934–12944, 2020.
- [11] Mathias Beiglböck, Gudmund Pammer, Lorenz Riess, and Stefan Schrott. The fundamental theorem of weak optimal transport. *arXiv preprint arXiv:2501.16316*, 2025.
- [12] Mathieu Blondel, Vivien Seguy, and Antoine Rolet. Smooth and sparse optimal transport, 2018.
- [13] Vladimir Igorevich Bogachev. *Measure Theory*, volume 2. Springer, 2007.
- [14] Clément Bonet, Kimia Nadjahi, Thibault Sejourne, Kilian Fatras, and Nicolas Courty. Slicing unbalanced optimal transport. *Transactions on Machine Learning Research*, 2024.
- [15] David P Bourne, Bernhard Schmitzer, and Benedikt Wirth. Semi-discrete unbalanced optimal transport and quantization. *arXiv:1808.01962*, 2018.
- [16] Wanxing Chang, Ye Shi, Hoang Tuan, and Jingya Wang. Unified optimal transport framework for universal domain adaptation. *Advances in Neural Information Processing Systems*, 35:29512–29524, 2022.
- [17] Laetitia Chapel, Rémi Flamary, Haoran Wu, Cédric Févotte, and Gilles Gasso. Unbalanced optimal transport through non-negative penalized linear regression. *Advances in Neural Information Processing Systems*, 34:23270–23282, 2021.
- [18] Yucheng Chen, Matus Telgarsky, Chao Zhang, Bolton Bailey, Daniel Hsu, and Jian Peng. A gradual, semi-discrete approach to generative network training via explicit wasserstein minimization. In *International Conference on Machine Learning*, pages 1071–1080. PMLR, 2019.
- [19] Lenaic Chizat, Gabriel Peyré, Bernhard Schmitzer, and François-Xavier Vialard. An interpolating distance between optimal transport and fisher–rao metrics. *Foundations of Computational Mathematics*, 18:1–44, 2018.
- [20] Lenaic Chizat, Gabriel Peyré, Bernhard Schmitzer, and François-Xavier Vialard. Scaling algorithms for unbalanced optimal transport problems. *Mathematics of Computation*, 87(314):2563–2609, 2018.
- [21] Jaemoo Choi, Jaewoong Choi, and Myungjoo Kang. Generative modeling through the semi-dual formulation of unbalanced optimal transport. *Advances in Neural Information Processing Systems*, 36:42433–42455, 2023.
- [22] Nhan-Phu Chung and Thanh-Son Trinh. Weak optimal entropy transport problems. *Potential Analysis*, 2025 to appear.
- [23] Nicolas Courty, Rémi Flamary, Devis Tuia, and Alain Rakotomamonjy. Optimal transport for domain adaptation. *IEEE Transactions on Pattern Analysis and Machine Intelligence*, 39(9):1853–1865, 2016.
- [24] Marco Cuturi. Sinkhorn distances: Lightspeed computation of optimal transport. *Advances in Neural Information Processing Systems*, 26, 2013.
- [25] Nabarun Deb, Promit Ghosal, and Bodhisattva Sen. Rates of estimation of optimal transport maps using plug-in estimators via barycentric projections. *Advances in Neural Information Processing Systems*, 34:29736–29753, 2021.

- [26] Vincent Divol, Jonathan Niles-Weed, and Aram-Alexandre Pooladian. Optimal transport map estimation in general function spaces. *arXiv preprint arXiv:2212.03722*, 2022.
- [27] Ivar Ekeland and Roger Témam. Convex analysis and variational problems, corrected reprint of the 1976 english edition. *Classics in Applied Mathematic*, 28, 1999.
- [28] Kilian Fatras, Thibault Séjourné, Rémi Flamary, and Nicolas Courty. Unbalanced minibatch optimal transport; applications to domain adaptation. In *International Conference on Machine Learning*, pages 3186–3197. PMLR, 2021.
- [29] Jean Feydy, Thibault Séjourné, François-Xavier Vialard, Shun-ichi Amari, Alain Trounev, and Gabriel Peyré. Interpolating between optimal transport and MMD using sinkhorn divergences. In *The 22nd International Conference on Artificial Intelligence and Statistics*, pages 2681–2690. PMLR, 2019.
- [30] Aden Forrow, Jan-Christian Hütter, Mor Nitzan, Philippe Rigollet, Geoffrey Schiebinger, and Jonathan Weed. Statistical optimal transport via factored couplings. In *The 22nd International Conference on Artificial Intelligence and Statistics*, pages 2454–2465. PMLR, 2019.
- [31] Promit Ghosal and Bodhisattva Sen. Multivariate ranks and quantiles using optimal transport: Consistency, rates and nonparametric testing. *The Annals of Statistics*, 50(2):1012–1037, 2022.
- [32] Nathael Gozlan, Cyril Roberto, Paul-Marie Samson, and Prasad Tetali. Kantorovich duality for general transport costs and applications. *Journal of Functional Analysis*, 273(11):3327–3405, 2017.
- [33] Jinhui Han, Xiaolong Li, Suresh P Sethi, Chi Chung Siu, and Sheung Chi Phillip Yam. Production management with general demands and lost sales. *Operations Research*, 72(5):1751–1764, 2024.
- [34] Jinhui Han, Suresh Sethi, and Tingjin Yan. Production and risk hedging with cointegration analytics. *Available at SSRN 5219499*, 2025.
- [35] Nhat Ho, XuanLong Nguyen, Mikhail Yurochkin, Hung Hai Bui, Viet Huynh, and Dinh Phung. Multilevel clustering via wasserstein means. In *International Conference on Machine Learning*, pages 1501–1509. PMLR, 2017.
- [36] Jan-Christian Hütter and Philippe Rigollet. Minimax estimation of smooth optimal transport maps. *The Annals of Statistics*, 49(2), 2021.
- [37] Jinyang Jiang, Jinhui Han, Yijie Peng, and Ying Zhang. Closing the loop: Coordinating inventory and recommendation via deep reinforcement learning on multiple timescales. *arXiv preprint arXiv:2510.04272*, 2025.
- [38] Michael Kupper, Max Nendel, and Alessandro Sgarabottolo. Risk measures based on weak optimal transport. *Quantitative Finance*, 25(2):163–180, 2025.
- [39] Harold J Kushner and G George Yin. *Stochastic approximation and recursive algorithms and applications*. Springer, 2003.
- [40] Zehao Li and Yijie Peng. Eliminating ratio bias for gradient-based simulated parameter estimation. *arXiv preprint arXiv:2411.12995*, 2024.
- [41] Zehao Li and Yijie Peng. A new stochastic approximation method for gradient-based simulated parameter estimation. *arXiv preprint arXiv:2503.18319*, 2025.
- [42] Matthias Liero, Alexander Mielke, and Giuseppe Savaré. Optimal transport in competition with reaction: The hellinger–kantorovich distance and geodesic curves. *SIAM Journal on Mathematical Analysis*, 48(4):2869–2911, 2016.
- [43] Matthias Liero, Alexander Mielke, and Giuseppe Savaré. Optimal entropy-transport problems and a new hellinger–kantorovich distance between positive measures. *Inventiones Mathematicae*, 211(3):969–1117, 2018.
- [44] Tudor Manole, Sivaraman Balakrishnan, Jonathan Niles-Weed, and Larry Wasserman. Plugin estimation of smooth optimal transport maps. *The Annals of Statistics*, 52(3):966–998, 2024.
- [45] Debarghya Mukherjee, Aritra Guha, Justin M Solomon, Yuekai Sun, and Mikhail Yurochkin. Outlier-robust optimal transport. In *International Conference on Machine Learning*, pages 7850–7860. PMLR, 2021.
- [46] Boris Muzellec and Marco Cuturi. Generalizing point embeddings using the wasserstein space of elliptical distributions. *Advances in Neural Information Processing Systems*, 31, 2018.

- [47] Boris Muzellec, Adrien Vacher, Francis Bach, François-Xavier Vialard, and Alessandro Rudi. Near-optimal estimation of smooth transport maps with kernel sums-of-squares. *SIAM Journal on Mathematics of Data Science*, 2024.
- [48] Kalyanapuram Rangachari Parthasarathy. *Probability Measures on Metric Spaces*, volume 352. American Mathematical Soc., 2005.
- [49] Michaël Perrot, Nicolas Courty, Rémi Flamary, and Amaury Habrard. Mapping estimation for discrete optimal transport. *Advances in Neural Information Processing Systems*, 29, 2016.
- [50] Nicholas C Petruzzi and Maqbool Dada. Pricing and the newsvendor problem: A review with extensions. *Operations research*, 47(2):183–194, 1999.
- [51] Gabriel Peyré, Marco Cuturi, et al. Computational optimal transport: With applications to data science. *Foundations and Trends® in Machine Learning*, 11(5-6):355–607, 2019.
- [52] Khiem Pham, Khang Le, Nhat Ho, Tung Pham, and Hung Bui. On unbalanced optimal transport: An analysis of sinkhorn algorithm. In *International Conference on Machine Learning*, pages 7673–7682. PMLR, 2020.
- [53] Benedetto Piccoli and Francesco Rossi. Generalized wasserstein distance and its application to transport equations with source. *Archive for Rational Mechanics and Analysis*, 211:335–358, 2014.
- [54] Benedetto Piccoli and Francesco Rossi. On properties of the generalized wasserstein distance. *Archive for Rational Mechanics and Analysis*, 222:1339–1365, 2016.
- [55] Aram-Alexandre Pooladian, Vincent Divol, and Jonathan Niles-Weed. Minimax estimation of discontinuous optimal transport maps: The semi-discrete case. In *International Conference on Machine Learning*, pages 28128–28150. PMLR, 2023.
- [56] Aram-Alexandre Pooladian and Jonathan Niles-Weed. Entropic estimation of optimal transport maps. *arXiv preprint arXiv:2109.12004*, 2021.
- [57] Meyer Scetbon, Michal Klein, Giovanni Palla, and Marco Cuturi. Unbalanced low-rank optimal transport solvers. *Advances in Neural Information Processing Systems*, 36:52312–52325, 2023.
- [58] Thibault Séjourné, Gabriel Peyré, and François-Xavier Vialard. Unbalanced optimal transport, from theory to numerics. *Handbook of Numerical Analysis*, 24:407–471, 2023.
- [59] Justin Solomon, Fernando De Goes, Gabriel Peyré, Marco Cuturi, Adrian Butscher, Andy Nguyen, Tao Du, and Leonidas Guibas. Convolutional wasserstein distances: Efficient optimal transportation on geometric domains. *ACM Transactions on Graphics (ToG)*, 34(4):1–11, 2015.
- [60] Adrien Vacher and François-Xavier Vialard. Semi-dual unbalanced quadratic optimal transport: fast statistical rates and convergent algorithm. In *International Conference on Machine Learning*, pages 34734–34758. PMLR, 2023.
- [61] VS Varadarajan. Measures on topological spaces. *Matematicheskii Sbornik*. 1961, vol. 55, pp 35–100 (in Russian). *American Mathematical Society Translations: Series 2*, 48:161–228, 1965.
- [62] Tomas Vaskevicius and Lénaïc Chizat. Computational guarantees for doubly entropic wasserstein barycenters. In A. Oh, T. Naumann, A. Globerson, K. Saenko, M. Hardt, and S. Levine, editors, *Advances in Neural Information Processing Systems*, volume 36, pages 12363–12388. Curran Associates, Inc., 2023.
- [63] Jun Wang, Bohan Lei, Xiaoyin Xu, Yueting Zhuang, and Min Zhang. A novel conditional medical image generation gan with latent space optimal transport. In *2023 IEEE International Conference on Medical Artificial Intelligence (MedAI)*, pages 453–458. IEEE, 2023.
- [64] Chang Xiao, Peilin Zhong, and Changxi Zheng. Bourgan: Generative networks with metric embeddings. *Advances in Neural Information Processing Systems*, 31, 2018.
- [65] Karren D Yang and Caroline Uhler. Scalable unbalanced optimal transport using generative adversarial networks. *arXiv preprint arXiv:1810.11447*, 2018.
- [66] Zhenyi Zhang, Tiejun Li, and Peijie Zhou. Learning stochastic dynamics from snapshots through regularized unbalanced optimal transport. *arXiv preprint arXiv:2410.00844*, 2024.
- [67] Yi Zheng, Zehao Li, Peng Jiang, and Yijie Peng. Dual-agent deep reinforcement learning for dynamic pricing and replenishment. *arXiv preprint arXiv:2410.21109*, 2024.

- [68] Fan Zhou, Shikai Luo, Xiaohu Qie, Jieping Ye, and Hongtu Zhu. Graph-based equilibrium metrics for dynamic supply–demand systems with applications to ride-sourcing platforms. *Journal of the American Statistical Association*, 116(536):1688–1699, 2021.

## A Proofs of assertions in Section 3

### A.1 Auxiliary lemmas

**Lemma A.1.** *Let  $X$  be a metric space and  $\mu_1, \mu_2, \nu_1, \nu_2 \in \mathcal{M}(X)$ . Then*

$$|(\mu_1 - \nu_1)^+| + |(\mu_2 - \nu_2)^+| \geq |(\mu_1 + \mu_2 - \nu_1 - \nu_2)^+|.$$

*Proof.* The results follow from that

$$\begin{aligned} (\mu_1 - \nu_1)^+ + (\mu_2 - \nu_2)^+ &= \frac{1}{2} \left[ |\mu_1 - \nu_1| + |\mu_2 - \nu_2| + \mu_1 - \nu_1 + \mu_2 - \nu_2 \right] \\ &\geq \frac{1}{2} \left[ |\mu_1 + \mu_2 - (\nu_1 + \nu_2)| + \mu_1 + \mu_2 - (\nu_1 + \nu_2) \right] \\ &= (\mu_1 + \mu_2 - (\nu_1 + \nu_2))^+. \end{aligned}$$

□

**Lemma A.2.** *Let  $X$  be a metric space and  $\mu, \nu \in \mathcal{M}(X)$ . Then*

$$|(\mu - \nu)^+| \geq (\mu(X) - \nu(X))^+.$$

*Proof.* Let  $\nu = f\mu + \nu^\perp$  be the Lebesgue decomposition of  $\nu$  with respect to  $\mu$ . Then

$$\begin{aligned} |(\mu - \nu)^+| &= |((1 - f)\mu - \nu^\perp)^+| \\ &= \int_X (1 - f)^+ d\mu \\ &= \frac{1}{2} \int_X (|1 - f| + 1 - f) d\mu \\ &\geq \frac{1}{2} \left( \left| \int_X (1 - f) d\mu \right| + \int_X (1 - f) d\mu \right) \\ &= \left( \int_X (1 - f) d\mu \right)^+ \\ &= (\mu(X) - \nu(X))^+. \end{aligned}$$

□

**Lemma A.3.** *Let  $c_1$  and  $c_2$  be non-negative numbers. We define the map  $J : \mathbb{R} \rightarrow (-\infty, +\infty]$  by*

$$J(\phi) = \sup_{s > 0} \frac{\phi - c_1(1 - s)^+ - c_2(s - 1)^+}{s} = \begin{cases} +\infty & \text{if } \phi > c_1, \\ \phi & \text{if } -c_2 \leq \phi \leq c_1, \\ -c_2 & \text{otherwise.} \end{cases}$$

*Then for every  $\nu, \mu \in \mathcal{M}(X)$  we have that*

$$c_1|(\mu - \nu)^+| + c_2|(\nu - \mu)^+| \geq \int_X \varphi d\mu - \int_X J(\varphi) d\nu,$$

*for every  $\varphi \in B(X)$  satisfying that  $\sup_{x \in X} \varphi(x) \leq c_1$ .*

*Proof.* The statement is true for the case  $\mu = \nu$  are the null measure. Therefore, we can assume that  $(\mu + \nu)(X) > 0$ . Let  $h$  be the Lebesgue density of  $\nu$  with respect to  $\mu + \nu$ . We define  $V := \{x \in X : 0 < h(x) < 1\}$ ,  $V_\mu := \{x \in X : h(x) = 0\}$  and  $V_\nu := \{x \in X : h(x) = 1\}$ . Then

$(V, V_\mu, V_\nu)$  is a Borel partition of  $X$ . We define the Borel functions  $f$  on  $X$  by  $f := \frac{h}{1-h}$  on  $V$ , and  $f = 0$  on  $X \setminus V$ . Then  $\nu = f\mu + \nu^\perp$ ,  $\nu^\perp(X \setminus V_\nu) = \mu(V_\nu) = 0$ . Then

$$\begin{aligned} c_1|(\mu - \nu)^+| + c_2|(\nu - \mu)^+| &= c_1|[(1-f)\mu - \nu^\perp]^+| + c_2|[(f-1)\mu + \nu^\perp]^+| \\ &= c_1 \int_{X \setminus V_\nu} (1-f)^+ d\mu + c_2 \left[ \int_{X \setminus V_\mu} (f-1)^+ d\mu + \nu^\perp(V_\nu) \right]. \end{aligned}$$

By the definition of  $J$  we get that  $c_1(1-f)^+ + c_2(f-1)^+ + fJ(\varphi) - \varphi \geq 0$ . Hence for every  $\varphi \in B(X)$  with  $\sup_{x \in X} \varphi(x) \leq c_1$  we have that

$$\begin{aligned} &c_1|(\mu - \nu)^+| + c_2|(\nu - \mu)^+| - \int_X \varphi d\mu + \int_X J(\varphi) d\nu \\ &\geq c_1 \left[ \int_V (1-f)^+ d\mu + \int_{V_\mu} d\mu \right] + c_2 \left[ \int_V (f-1)^+ d\mu + \int_{V_\nu} d\nu^\perp \right] - \left( \int_V \varphi d\mu + \int_{V_\mu} \varphi d\mu \right) \\ &\quad + \left( \int_V fJ(\varphi) d\mu + \int_{V_\nu} J(\varphi) d\nu^\perp \right) \\ &= \int_V (c_1(1-f)^+ + c_2(f-1)^+ + fJ(\varphi) - \varphi) d\mu + \int_{V_\mu} (c_1 - \varphi) d\mu + \int_{V_\nu} (c_2 + J(\varphi)) d\nu^\perp \\ &\geq 0. \end{aligned}$$

□

## A.2 Proof of Theorem 3.1

Before proving Theorem 3.1, let us provide some examples of the function  $C : X_1 \times \mathcal{P}(X_2) \rightarrow (-\infty, +\infty]$  having property (T) (see Definition 3.1). Recall that for a metric space  $X$ ,  $\{\nu^n\}_{n \in \mathbb{N}} \subset \mathcal{M}(X)$  is tight if for every  $\varepsilon > 0$ , there exists a compact subset  $K_\varepsilon$  of  $X$  such that  $\nu^n(X \setminus K_\varepsilon) < \varepsilon$  for every  $n \in \mathbb{N}$ .

**Example A.1.** Let  $c : X_1 \times X_2 \rightarrow (-\infty, +\infty]$  be a measurable function. Assume that  $c$  has compact sublevels, i.e. for every  $L \in \mathbb{R}$ , the subset  $\{(x_1, x_2) \in X_1 \times X_2 : c(x_1, x_2) \leq L\}$  of  $X_1 \times X_2$  is compact. We define the map

$$C : X_1 \times \mathcal{P}(X_2) \rightarrow (-\infty, +\infty]$$

by  $C(x_1, p) = \int_{X_2} c(x_1, x_2) dp(x_2)$  for every  $x_1 \in X_1$ , and  $p \in \mathcal{P}(X_2)$ . Given  $M > 0$  and let  $\{\gamma^n\}_{n \in \mathbb{N}} \subset \mathcal{M}(X_1 \times X_2)$  such that  $\int_{X_1} C(x_1, \gamma_{x_1}^n) d\gamma_1^n(x_1) \leq M$ , for every  $n \in \mathbb{N}$ . For every  $L > 0$ , the set

$$A_L := \{(x_1, x_2) \in X_1 \times X_2 : c(x_1, x_2) \leq L\}$$

is compact. Since

$$\int_{X_1 \times X_2} c(x_1, x_2) d\gamma^n(x_1, x_2) = \int_{X_1} \int_{X_2} c(x_1, x_2) d\gamma_{x_1}^n(x_2) d\gamma_1^n(x_1) = \int_{X_1} C(x_1, \gamma_{x_1}^n) d\gamma_1^n(x_1),$$

for every  $L > 0$ , we have

$$\gamma^n((X_1 \times X_2) \setminus A_L) \leq \frac{\int_{X_1 \times X_2} c d\gamma^n}{L} = \frac{\int_{X_1} C(x_1, \gamma_{x_1}^n) d\gamma_1^n(x_1)}{L} \leq \frac{M}{L}.$$

For every  $\varepsilon > 0$ , choose  $L > 0$  such that  $\frac{M}{L} < \varepsilon$ , then  $\gamma^n((X_1 \times X_2) \setminus A_L) < \varepsilon$ , for every  $n \in \mathbb{N}$ . Therefore, the map  $C$  has property (T).

**Example A.2.** If  $C(x_1, p) = \alpha\left(\int_{X_2} c(x_1, x_2) dp(x_2)\right)$ , for every  $x_1 \in X_1$ ,  $p \in \mathcal{P}(X_2)$  for some non-decreasing function  $\alpha : (-\infty, +\infty] \rightarrow (-\infty, +\infty]$ , and  $c$  has compact sublevels, then  $C$  has property (T).

**Example A.3.** If  $X_1$  and  $X_2$  are compact, then every measurable map  $C : X_1 \times \mathcal{P}(X_2) \rightarrow (-\infty, +\infty]$  has property (T).

*Proof of Theorem 3.1.* Let  $\{\gamma^n\}_{n \in \mathbb{N}} \subset \mathcal{M}(X_1 \times X_2)$  such that  $\mathcal{E}_C(\mu_1, \mu_2) = \lim_{n \rightarrow \infty} \text{ET}_C(\gamma^n | \mu_1, \mu_2)$ . First, we will prove that  $\{\gamma^n\}$  is bounded. Choose  $t_0 \geq 0$  such that  $\frac{F_1(s)}{s} \geq \frac{b_1}{2}$  and  $\frac{F_2(s)}{s} \geq \frac{b_2}{2}$  for every  $s \geq t_0$ , where  $F_i(s) = a_i(1-s)^+ + b_i(s-1)^+$ . Now we will show that

$$\gamma^n(X_1 \times X_2) \leq \frac{2}{M} \text{ET}_C(\gamma^n | \mu_1, \mu_2) \text{ for all } \gamma^n \text{ with } \gamma^n(X_1 \times X_2) \geq t_0 \max\{\mu_1(X_1), \mu_2(X_2)\}, \quad (13)$$

where  $M := \frac{b_1}{2} + \frac{b_2}{2} + \inf C > 0$ . Let  $\gamma^n$  with  $\gamma^n(X_1 \times X_2) \geq t_0 \max\{\mu_1(X_1), \mu_2(X_2)\}$ . If  $\mu_1(X_1) = 0$  then  $\mathcal{F}_1(\gamma_1^n | \mu_1) = b_1 \gamma_1^n(X_1)$ . If  $\mu_1(X_1) > 0$  then by the choice of  $t_0$  and Lemma A.2 we get that

$$\begin{aligned} \mathcal{F}_1(\gamma_1^n | \mu_1) &= a_1 |(\mu_1 - \gamma_1^n)^+| + b_1 |(\gamma_1^n - \mu_1)^+| \\ &\geq a_1 (\mu_1(X_1) - \gamma_1^n(X_1))^+ + b_1 (\gamma_1^n(X_1) - \mu_1(X_1))^+ \\ &= \mu_1(X_1) \left[ a_1 \left( 1 - \frac{\gamma_1^n(X_1)}{\mu_1(X_1)} \right)^+ + b_1 \left( \frac{\gamma_1^n(X_1)}{\mu_1(X_1)} - 1 \right)^+ \right] \\ &= \gamma_1^n(X_1) \frac{\mu_1(X_1)}{\gamma_1^n(X_1)} F_1\left(\frac{\gamma_1^n(X_1)}{\mu_1(X_1)}\right) \\ &\geq \gamma_1^n(X_1) \frac{b_1}{2}. \end{aligned}$$

Therefore,  $\mathcal{F}_1(\gamma_1^n | \mu_1) \geq \gamma^n(X_1 \times X_2) \frac{b_1}{2}$  for all  $\gamma^n$  with  $\gamma^n(X_1 \times X_2) \geq t_0 \max\{\mu_1(X_1), \mu_2(X_2)\}$ . Similarly,  $\mathcal{F}_2(\gamma_2^n | \mu_2) \geq \gamma^n(X_1 \times X_2) \frac{b_2}{2}$  for all  $\mu_2$  and  $\gamma^n$  with  $\gamma^n(X_1 \times X_2) \geq t_0 \max\{\mu_1(X_1), \mu_2(X_2)\}$ . Then for all  $\gamma^n$  with  $\gamma^n(X_1 \times X_2) \geq t_0 \max\{\mu_1(X_1), \mu_2(X_2)\}$  we have that

$$\begin{aligned} \text{ET}_C^{\mathbf{k}_1, \mathbf{k}_2}(\gamma^n | \mu_1, \mu_2) &= \mathcal{F}_1(\gamma_1^n | \mu_1) + \mathcal{F}_2(\gamma_2^n | \mu_2) + \int_{X_1} C(x_1, \gamma_{x_1}^n) d\gamma_1^n(x_1) \\ &\geq \gamma^n(X_1 \times X_2) \left( \frac{b_1}{2} + \frac{b_2}{2} + \inf C \right). \end{aligned}$$

Hence we get that  $\{\gamma^n\}_{n \in \mathbb{N}}$  is bounded.

$$\gamma^n(X_1 \times X_2) \leq \frac{2}{M} \text{ET}_C(\gamma^n | \mu_1, \mu_2) \text{ for all } \gamma^n \text{ with } \gamma^n(X_1 \times X_2) \geq t_0 \max\{\mu_1(X_1), \mu_2(X_2)\}, \quad (14)$$

Now we will prove that  $\{\gamma^n\}_{n \in \mathbb{N}}$  is tight. There exists  $K > 0$  such that  $\text{ET}_C^{\mathbf{a}, \mathbf{b}}(\gamma^n | \mu_1, \mu_2) \leq K$  and hence  $\int_{X_1} C(x_1, \gamma_{x_1}^n) d\gamma_1^n(x_1) \leq K$  for every  $n$ . Since  $C$  has property (T), we get that  $\{\gamma^n\}$  is tight. As  $\{\gamma^n\}$  is tight and bounded, there exists  $\gamma^0 \in \mathcal{M}(X_1 \times X_2)$  and a subsequence of  $\{\gamma^n\}$  which is still denoted by  $\{\gamma^n\}$  such that  $\gamma^n$  converges weakly to  $\gamma^0$ . From [42, Corollary 2.9] and [22, Lemma 4] we get that the map  $\gamma \mapsto \mathcal{E}_C(\gamma | \mu_1, \mu_2)$  is lower semicontinuous. Therefore,  $\gamma^0$  is an optimal plan of problem (1).  $\square$

**Remark A.1.** If  $C$  is nonnegative, we can prove the boundedness of  $\{\gamma^n\}$  easier as follows. Choose  $M > 0$  such that  $\text{ET}_C^{\mathbf{a}, \mathbf{b}}(\gamma^n | \mu_1, \mu_2) \leq M$  for every  $n \in \mathbb{N}$ . First, we will prove that  $\{\gamma^n\}$  is bounded. As  $C$  is nonnegative we get that  $a_1 |(\mu_1 - \gamma_1^n)^+| + b_1 |(\gamma_1^n - \mu_1)^+| \leq M$  for every  $n \in \mathbb{N}$ . Then  $|\gamma_1^n - \mu_1|(X_1) = |(\mu_1 - \gamma_1^n)^+| + |(\gamma_1^n - \mu_1)^+|$  is bounded. Hence  $\gamma_1^n(X_1)$  is bounded. Therefore  $\{\gamma^n\}$  is bounded.

### A.3 Proof of Theorem 3.2

**Lemma A.4.** We have

$$\sup_{(\varphi_1, \varphi_2) \in \Phi_J} \sum_{i=1}^2 \int_{X_i} \varphi_i(x_i) d\mu_i(x_i) = \sup_{(\varphi_1, \varphi_2) \in \Phi_I} \sum_{i=1}^2 \int_{X_i} I_i(\varphi_i(x_i)) d\mu_i(x_i). \quad (15)$$



*Proof.* For any  $(\varphi_1, \varphi_2) \in \Phi_J$ , we have  $-b_1 \leq J_1(\varphi_1(x_1)) \leq a_1$ ,  $-b_2 \leq J_2(\varphi_2(x_2)) \leq a_2$  and  $J_1(\varphi_1(x_1)) + p(J_2(\varphi_2)) \leq C(x_1, p)$  for every  $x_1 \in X_1, p \in \mathcal{P}(X_2)$ . Since  $J_1$  and  $J_2$  are continuous on  $(-\infty, a_1]$  and  $(-\infty, a_2]$ , respectively, one has  $(J_1(\varphi_1), J_2(\varphi_2)) \in \Phi_I$ . Therefore,

$$\begin{aligned} \sum_{i=1}^2 \int_{X_i} \varphi_i(x_i) d\mu_i(x_i) &\leq \sum_{i=1}^2 \int_{X_i} J_i(\varphi_i(x_i)) d\mu_i(x_i) \\ &= \sum_{i=1}^2 \int_{X_i} I_i \circ J_i(\varphi_i(x_i)) d\mu_i(x_i) \\ &\leq \sup_{(\varphi_1, \varphi_2) \in \Phi_I} \sum_{i=1}^2 \int_{X_i} I_i(\varphi_i(x_i)) d\mu_i(x_i). \end{aligned}$$

On the other hand, for any  $(\varphi_1, \varphi_2) \in \Phi_I$ , we have  $-b_1 \leq I_1(\varphi_1(x_1)) \leq a_1$ ,  $-b_2 \leq I_2(\varphi_2(x_2)) \leq a_2$  and hence  $J_1 \circ I_1(\varphi_1(x_1)) + p(J_2 \circ I_2(\varphi_2)) \leq C(x_1, p)$  for every  $x_1 \in X_1, p \in \mathcal{P}(X_2)$ . Since  $I_1$  and  $I_2$  are continuous on  $[-b_1, \infty)$  and  $[-b_2, \infty)$ , respectively, one has  $(I_1(\varphi_1), I_2(\varphi_2)) \in \Phi_J$ . Hence,

$$\sum_{i=1}^2 \int_{X_i} I_i(\varphi_i(x_i)) d\mu_i(x_i) \leq \sup_{(\varphi_1, \varphi_2) \in \Phi_J} \sum_{i=1}^2 \int_{X_i} \varphi_i(x_i) d\mu_i(x_i).$$

We obtain the result.  $\square$

Given a metric space  $X$ , for every  $\mu \in \mathcal{M}(X)$ , the map  $T_\mu : C_b(X) \rightarrow \mathbb{R}$ , defined by  $f \mapsto \int_X f d\mu$ , is a bounded linear operator, i.e., it belongs to  $(C_b(X))^*$ . We define the functional  $\text{ET} : (C_b(X_1))^* \times (C_b(X_2))^* \rightarrow [-\infty, +\infty]$  as follows.

$$\text{ET}^{\mathbf{k}_1, \mathbf{k}_2}(T_1, T_2) := \begin{cases} \mathcal{E}_C(\mu_1, \mu_2) & \text{if } (T_1, T_2) = (T_{\mu_1}, T_{\mu_2}), \\ +\infty & \text{otherwise,} \end{cases}$$

Given  $\mu, \nu \in \mathcal{M}(X)$ , if  $\int_X f d\mu = \int_X f d\nu$  for every  $f \in C_b(X)$  then one gets  $\mu = \nu$  [48, Theorem 5.9, page 39]. Therefore, for every metric space  $X$  we can consider  $\mathcal{M}(X)$  as a subset of  $(C_b(X))^*$ . Hence, the map  $\text{ET}^{\mathbf{k}_1, \mathbf{k}_2, k}$  is well defined.

For convenience, we will write  $\text{ET}^{\mathbf{k}_1, \mathbf{k}_2}(\mu_1, \mu_2)$  for  $\text{ET}^{\mathbf{k}_1, \mathbf{k}_2}(T_{\mu_1}, T_{\mu_2})$  for every  $(\mu_1, \mu_2) \in \mathcal{M}(X_1) \times \mathcal{M}(X_2)$ . The weak topology on  $\mathcal{M}(X)$  is the smallest topology such that for each  $f \in C_b(X)$ , the map  $\mu \mapsto \int_X f d\mu$  is continuous, i.e. a sequence  $\{\mu_n\}_{n \in \mathbb{N}} \subset \mathcal{M}(X)$  converges weakly to  $\mu \in \mathcal{M}(X)$  if and only if  $\lim_{n \rightarrow \infty} \int_X f d\mu_n = \int_X f d\mu$  for every  $f \in C_b(X)$ .

**Lemma A.5.** *Let  $X_1, X_2$  be Polish metric spaces. Then*

1. *the functional  $\text{ET}^{\mathbf{k}_1, \mathbf{k}_2} : (C_b(X_1))^* \times (C_b(X_2))^* \rightarrow (-\infty, +\infty]$  is convex and positively one homogeneous, i.e.  $\text{ET}^{\mathbf{k}_1, \mathbf{k}_2}(\lambda T_1, \lambda T_2) = \lambda \text{ET}^{\mathbf{a}, \mathbf{b}}(T_1, T_2)$  for every  $\lambda \geq 0, T_1 \in (C_b(X_1))^*, T_2 \in (C_b(X_2))^*$ ;*
2. *Assume that  $c$  has compact sublevels in  $X_1 \times X_2$ . Then the function  $\text{ET}^{\mathbf{k}_1, \mathbf{k}_2}$  is lower semicontinuous under the weak topology.*

*Proof.* **Claim 1:** Using the convention that  $0 \cdot (+\infty) = 0$ , it is clear that  $\text{ET}^{\mathbf{k}_1, \mathbf{k}_2}(0, 0) = 0$  and  $\text{ET}^{\mathbf{a}, \mathbf{b}}(\lambda T_1, \lambda T_2) = \lambda \text{ET}^{\mathbf{k}_1, \mathbf{k}_2}(T_1, T_2)$  for every  $\lambda \geq 0, (T_1, T_2) \notin \mathcal{M}(X_1) \times \mathcal{M}(X_2)$ . Hence, to check  $\text{ET}^{\mathbf{k}_1, \mathbf{k}_2}$  is positively one homogeneous it is sufficient to check  $\text{ET}^{\mathbf{k}_1, \mathbf{k}_2}(\lambda T_{\mu_1}, \lambda T_{\mu_2}) = \lambda \text{ET}^{\mathbf{k}_1, \mathbf{k}_2}(T_{\mu_1}, T_{\mu_2})$  for every  $\lambda > 0, (\mu_1, \mu_2) \in \mathcal{M}(X_1) \times \mathcal{M}(X_2)$ . Given  $\gamma \in \mathcal{M}(X_1 \times X_2)$  and

$\lambda > 0$ . We have that

$$\begin{aligned}
\text{ET}^{\mathbf{k}_1, \mathbf{k}_2}(\lambda T_{\mu_1}, \lambda T_{\mu_2}) &= \text{ET}^{\mathbf{k}_1, \mathbf{k}_2}(T_{\lambda\mu_1}, T_{\lambda\mu_2}) = \mathcal{E}_C^{\mathbf{k}_1, \mathbf{k}_2}(\lambda\mu_1, \lambda\mu_2) \\
&= \inf\{\text{ET}^{\mathbf{k}_1, \mathbf{k}_2}(\gamma|\lambda\mu_1, \lambda\mu_2) : \gamma \in \mathcal{M}(X_1 \times X_2)\} \\
&= \inf\{\text{ET}^{\mathbf{k}_1, \mathbf{k}_2}(\lambda\gamma|\lambda\mu_1, \lambda\mu_2) : \gamma \in \mathcal{M}(X_1 \times X_2)\} \\
&= \inf\{a_1|(\lambda\mu_1 - \lambda\gamma_1)^+| + b_1|(\lambda\gamma_1 - \lambda\mu_1)^+| + a_2|(\lambda\mu_2 - \lambda\gamma_2)^+| + \\
&\quad + b_2|(\lambda\gamma_2 - \lambda\mu_2)^+| + \lambda \int_{X_1} C(x_1, \gamma_{x_1}) d\gamma_1(x_1) : \gamma \in \mathcal{M}(X_1 \times X_2)\} \\
&= \lambda \inf\{a_1|(\mu_1 - \gamma_1)^+| + b_1|(\gamma_1 - \mu_1)^+| + a_2|(\mu_2 - \gamma_2)^+| + \\
&\quad + b_2|(\gamma_2 - \mu_2)^+| + \int_{X_1} C(x_1, \gamma_{x_1}) d\gamma_1(x_1) : \gamma \in \mathcal{M}(X_1 \times X_2)\} \\
&= \lambda \text{ET}^{\mathbf{k}_1, \mathbf{k}_2}(\mu_1, \mu_2) \\
&= \lambda \text{ET}^{\mathbf{k}_1, \mathbf{k}_2}(T_{\mu_1}, T_{\mu_2}).
\end{aligned}$$

By the homogeneity property of  $\text{ET}^{\mathbf{k}_1, \mathbf{k}_2}$ , to show that  $\text{ET}^{\mathbf{k}_1, \mathbf{k}_2}$  is convex, we only need to check that

$$\text{ET}^{\mathbf{k}_1, \mathbf{k}_2}(\mu_1, \mu_2) + \text{ET}^{\mathbf{k}_1, \mathbf{k}_2}(\nu_1, \nu_2) \geq \text{ET}^{\mathbf{k}_1, \mathbf{k}_2}(\mu_1 + \nu_1, \mu_2 + \nu_2) \text{ for every } \mu_i, \nu_i \in \mathcal{M}(X_i), i = 1, 2.$$

We will consider  $(\mu_1, \mu_2), (\nu_1, \nu_2) \in \mathcal{M}(X_1) \times \mathcal{M}(X_2)$  such that  $\text{ET}^{\mathbf{k}_1, \mathbf{k}_2}(\mu_1, \mu_2) < \infty$  and  $\text{ET}^{\mathbf{k}_1, \mathbf{k}_2}(\nu_1, \nu_2) < \infty$  (the other cases are trivial). Let  $\{\gamma^n\}_{n \in \mathbb{N}}, \{\bar{\gamma}^n\}_{n \in \mathbb{N}} \subset \mathcal{M}(X_1 \times X_2)$  such that  $\text{ET}^{\mathbf{k}_1, \mathbf{k}_2}(\mu_1, \mu_2) = \lim_{n \rightarrow \infty} \text{ET}^{\mathbf{k}_1, \mathbf{k}_2}(\gamma^n|\mu_1, \mu_2)$  and  $\text{ET}^{\mathbf{k}_1, \mathbf{k}_2}(\nu_1, \nu_2) = \lim_{n \rightarrow \infty} \text{ET}^{\mathbf{k}_1, \mathbf{k}_2}(\bar{\gamma}^n|\nu_1, \nu_2)$ .

As  $\left( (d\gamma_1^n/d(\gamma_1^n + \bar{\gamma}_1^n))\gamma_{x_1}^n + (d\bar{\gamma}_1^n/d(\gamma_1^n + \bar{\gamma}_1^n))\bar{\gamma}_{x_1}^n \right)_{x_1 \in X_1}$  is the disintegration of  $\gamma^n + \bar{\gamma}^n$  with respect to  $\gamma_1^n + \bar{\gamma}_1^n$  and  $C(x_1, \cdot)$  is convex on  $\mathcal{P}(X_2)$  for every  $x_1 \in X_1$ , we obtain that

$$\int_{X_1} C(x_1, \gamma_{x_1}^n) d\gamma_1^n(x_1) + \int_{X_1} C(x_1, \bar{\gamma}_{x_1}^n) d\bar{\gamma}_1^n(x_1) \geq \int_{X_1} C(x_1, (\gamma^n + \bar{\gamma}^n)_{x_1}) d(\gamma_1^n + \bar{\gamma}_1^n)(x_1).$$

Combining with Lemma A.1, we have that

$$\begin{aligned}
&\text{ET}^{\mathbf{k}_1, \mathbf{k}_2}(\mu_1, \mu_2) + \text{ET}^{\mathbf{k}_1, \mathbf{k}_2}(\nu_1, \nu_2) \\
&= \lim_{n \rightarrow \infty} \left[ a_1|(\mu_1 - \gamma_1^n)^+| + b_1|(\gamma_1^n - \mu_1)^+| + a_2|(\mu_2 - \gamma_2^n)^+| + b_2|(\gamma_2^n - \mu_2)^+| + \int_{X_1} C(x_1, \gamma_{x_1}^n) d\gamma_1^n(x_1) + \right. \\
&\quad \left. + a_1|(\nu_1 - \bar{\gamma}_1^n)^+| + b_1|(\bar{\gamma}_1^n - \nu_1)^+| + a_2|(\nu_2 - \bar{\gamma}_2^n)^+| + b_2|(\bar{\gamma}_2^n - \nu_2)^+| + \int_{X_1} C(x_1, \bar{\gamma}_{x_1}^n) d\bar{\gamma}_1^n(x_1) \right] \\
&\geq \lim_{n \rightarrow \infty} \left[ a_1|(\mu_1 + \nu_1 - (\gamma_1^n + \bar{\gamma}_1^n))^+| + b_1|(\gamma_1^n + \bar{\gamma}_1^n - (\mu_1 + \nu_1))^+| + a_2|(\mu_1 + \nu_1 - (\gamma_1^n + \bar{\gamma}_1^n))^+| \right. \\
&\quad \left. + b_2|(\gamma_1^n + \bar{\gamma}_1^n - (\mu_1 + \nu_1))^+| + \int_{X_1} C(x_1, (\gamma^n + \bar{\gamma}^n)_{x_1}) d(\gamma_1^n + \bar{\gamma}_1^n)(x_1) \right] \\
&\geq \text{ET}^{\mathbf{k}_1, \mathbf{k}_2}(\mu_1 + \nu_1, \mu_2 + \nu_2).
\end{aligned}$$

Therefore,  $\text{ET}^{\mathbf{k}_1, \mathbf{k}_2}$  is convex.

**Claim 2:** For  $i = 1, 2$ , let  $\{\mu_i^n\} \subset \mathcal{M}(X_i)$  such that  $\mu_i^n$  weakly converges to  $\mu_i$  as  $n \rightarrow \infty$ .

To prove  $\text{ET}^{\mathbf{k}_1, \mathbf{k}_2}$  is lower semicontinuous, we need to show that

$$\liminf_{n \rightarrow \infty} \text{ET}^{\mathbf{k}_1, \mathbf{k}_2}(\mu_1^n, \mu_2^n) \geq \text{ET}^{\mathbf{k}_1, \mathbf{k}_2}(\mu_1, \mu_2).$$

We only need to check it for the case  $\liminf_{n \rightarrow \infty} \text{ET}^{\mathbf{k}_1, \mathbf{k}_2}(\mu_1^n, \mu_2^n) < \infty$ . We can choose a subsequence  $\{n_j\}_{j \in \mathbb{N}}$  such that  $\liminf_{n \rightarrow \infty} \text{ET}^{\mathbf{k}_1, \mathbf{k}_2}(\mu_1^n, \mu_2^n) = \lim_{j \rightarrow \infty} \text{ET}^{\mathbf{k}_1, \mathbf{k}_2}(\mu_1^{n_j}, \mu_2^{n_j})$ . For every  $j \in \mathbb{N}$ , applying Theorem 3.1 there exists  $\gamma^{n_j} \in \mathcal{M}(X_1 \times X_2)$  such that

$$\text{ET}^{\mathbf{k}_1, \mathbf{k}_2}(\mu_1^{n_j}, \mu_2^{n_j}) = \text{ET}^{\mathbf{k}_1, \mathbf{k}_2}(\gamma^{n_j}|\mu_1^{n_j}, \mu_2^{n_j}) \text{ for every } j \in \mathbb{N}.$$

Then there exists  $K > 0$  such that  $\text{ET}^{\mathbf{k}_1, \mathbf{k}_2}(\gamma^{n_j} | \mu_1^{n_j}, \mu_2^{n_j}) \leq K$  for every  $j$ . Hence  $\int_{X_1} C(x_1, \gamma_{x_1}^{n_j}) d\gamma_1^{n_j}(x_1) \leq K$  for every  $j$ . Since  $C$  has property (T) we get that  $\{\gamma^{n_j}\}$  is tight.

Now we will prove that  $\{\gamma^{n_j}\}$  is bounded. Choose  $t_0 \geq 0$  such that  $\frac{F_1(s)}{s} \geq \frac{b_1}{2}$  and  $\frac{F_2(s)}{s} \geq \frac{b_2}{2}$  for every  $s \geq t_0$ . Now we will show that

$$\gamma^{n_j}(X_1 \times X_2) \leq \frac{2}{M} \text{ET}^{\mathbf{k}_1, \mathbf{k}_2}(\gamma^{n_j} | \mu_1^{n_j}, \mu_2^{n_j}) \text{ for all } \gamma^{n_j} \text{ with } \gamma^{n_j}(X_1 \times X_2) \geq t_0 \max\{\mu_1^{n_j}(X_1), \mu_2^{n_j}(X_2)\}, \quad (16)$$

where  $M := \frac{b_1}{2} + \frac{b_2}{2} + \inf C > 0$ . Let  $\gamma^{n_j}$  with  $\gamma^{n_j}(X_1 \times X_2) \geq t_0 \max\{\mu_1^{n_j}(X_1), \mu_2^{n_j}(X_2)\}$ . If  $\mu_1^{n_j}(X_1) = 0$  then  $\mathcal{F}_1(\gamma_1^{n_j} | \mu_1^{n_j}) = b_1 \gamma_1^{n_j}(X_1)$ . If  $\mu_1^{n_j}(X_1) > 0$  then by the choice of  $t_0$  and Lemma A.2 we get that

$$\begin{aligned} \mathcal{F}_1(\gamma_1^{n_j} | \mu_1^{n_j}) &= a_1 |(\mu_1^{n_j} - \gamma_1^{n_j})^+| + b_1 |(\gamma_1^{n_j} - \mu_1^{n_j})^+| \\ &\geq a_1 (\mu_1^{n_j}(X_1) - \gamma_1^{n_j}(X_1))^+ + b_1 (\gamma_1^{n_j}(X_1) - \mu_1^{n_j}(X_1))^+ \\ &\geq \mu_1^{n_j}(X_1) \left[ a_1 \left( 1 - \frac{\gamma_1^{n_j}(X_1)}{\mu_1^{n_j}(X_1)} \right)^+ + b_1 \left( \frac{\gamma_1^{n_j}(X_1)}{\mu_1^{n_j}(X_1)} - 1 \right)^+ \right] \\ &= \gamma_1^{n_j}(X_1) \frac{\mu_1^{n_j}(X_1)}{\gamma_1^{n_j}(X_1)} F_1\left(\frac{\gamma_1^{n_j}(X_1)}{\mu_1^{n_j}(X_1)}\right) \\ &\geq \gamma_1^{n_j}(X_1) \frac{b_1}{2}. \end{aligned}$$

Therefore,  $\mathcal{F}_1(\gamma_1^{n_j} | \mu_1^{n_j}) \geq \gamma^{n_j}(X_1 \times X_2) \frac{b_1}{2}$  for all  $\mu_1^{n_j}$  and  $\gamma^{n_j}$  with  $\gamma^{n_j}(X_1 \times X_2) \geq t_0 \max\{\mu_1^{n_j}(X_1), \mu_2^{n_j}(X_2)\}$ . Similarly,  $\mathcal{F}_2(\gamma_2^{n_j} | \mu_2^{n_j}) \geq \gamma^{n_j}(X_1 \times X_2) \frac{b_2}{2}$  for all  $\mu_2^{n_j}$  and  $\gamma^{n_j}$  with  $\gamma^{n_j}(X_1 \times X_2) \geq t_0 \max\{\mu_1^{n_j}(X_1), \mu_2^{n_j}(X_2)\}$ . Then for all  $\gamma^{n_j}$  with  $\gamma^{n_j}(X_1 \times X_2) \geq t_0 \max\{\mu_1^{n_j}(X_1), \mu_2^{n_j}(X_2)\}$  we have that

$$\begin{aligned} \text{ET}^{\mathbf{k}_1, \mathbf{k}_2}(\gamma^{n_j} | \mu_1^{n_j}, \mu_2^{n_j}) &= \mathcal{F}_1(\gamma_1^{n_j} | \mu_1^{n_j}) + \mathcal{F}_2(\gamma_2^{n_j} | \mu_2^{n_j}) + \int_{X_1} C(x_1, \gamma_{x_1}^{n_j}) d\gamma_1^{n_j}(x_1) \\ &\geq \gamma^{n_j}(X_1 \times X_2) \left( \frac{b_1}{2} + \frac{b_2}{2} + \inf C \right) \end{aligned}$$

Hence, we get (16). On the other hand,  $\{\mu_1^{n_j}(X_1)\}_{j \in \mathbb{N}}$  and  $\{\mu_2^{n_j}(X_2)\}_{j \in \mathbb{N}}$  are bounded as  $\mu_i^{n_j}$  weakly converges to  $\mu_i$  for  $i = 1, 2$ . Therefore  $\{\gamma^{n_j}\}_{j \in \mathbb{N}}$  is bounded. As  $\{\gamma^{n_j}\}_{j \in \mathbb{N}}$  is also tight, applying Prokhorov's theorem there exists a subsequence  $\{\gamma^{n_j}\}_{j \in \mathbb{N}}$ , still denoted by  $\{\gamma^{n_j}\}_{j \in \mathbb{N}}$ , and a  $\gamma \in \mathcal{M}(X_1 \times X_2)$  such that  $\gamma^{n_j}$  weakly converges to  $\gamma$ . Applying [13, Theorem 8.4.7] or [61, Part 2, Theorem 3] we get that

$$\liminf_{j \rightarrow \infty} |\mu_1^{n_j} - \gamma_1^{n_j}|(X_1) \geq |\mu_1 - \gamma_1|(X_1).$$

Hence

$$\begin{aligned} \liminf_{j \rightarrow \infty} |(\mu_1^{n_j} - \gamma_1^{n_j})^+| &= \liminf_{j \rightarrow \infty} \frac{1}{2} \left[ |\mu_1^{n_j} - \gamma_1^{n_j}|(X_1) + (\mu_1^{n_j} - \gamma_1^{n_j})(X_1) \right] \\ &\geq \frac{1}{2} \left[ |\mu_1 - \gamma_1|(X_1) + (\mu_1 - \gamma_1)(X_1) \right] \\ &= |(\mu_1 - \gamma_1)^+|. \end{aligned}$$

Similarly, we have

$$\begin{aligned} \liminf_{j \rightarrow \infty} |(\mu_2^{n_j} - \gamma_2^{n_j})^+| &\geq |(\mu_2 - \gamma_2)^+|, \\ \liminf_{j \rightarrow \infty} |(\gamma_1^{n_j} - \mu_1^{n_j})^+| &\geq |(\gamma_1 - \mu_1)^+|, \\ \liminf_{j \rightarrow \infty} |(\gamma_2^{n_j} - \mu_2^{n_j})^+| &\geq |(\gamma_2 - \mu_2)^+|. \end{aligned}$$

Then

$$\begin{aligned}
\liminf_{n \rightarrow \infty} \text{ET}^{\mathbf{k}_1, \mathbf{k}_2}(\mu_1^n, \mu_2^n) &= \liminf_{n \rightarrow \infty} \text{ET}^{\mathbf{k}_1, \mathbf{k}_2}(\gamma^n | \mu_1^n, \mu_2^n) \\
&= \liminf_{n \rightarrow \infty} \left[ a_1 |(\mu_1^{n_j} - \gamma_1^{n_j})^+| + b_1 |(\gamma_1^{n_j} - \mu_1^{n_j})^+| + a_2 |(\mu_2^{n_j} - \gamma_2^{n_j})^+| \right. \\
&\quad \left. + b_2 |(\gamma_2^{n_j} - \mu_2^{n_j})^+| + \int_{X_1} C(x_1, \gamma_{x_1}^{n_j}) d\gamma_1^{n_j}(x_1) \right] \\
&\geq a_1 |(\mu_1 - \gamma_1)^+| + b_1 |(\gamma_1 - \mu_1)^+| + a_2 |(\mu_2 - \gamma_2)^+| \\
&\quad + b_2 |(\gamma_2 - \mu_2)^+| + \int_{X_1} C(x_1, \gamma_{x_1}^{n_j}) d\gamma_1^{n_j}(x_1) \\
&\geq \text{ET}^{\mathbf{k}_1, \mathbf{k}_2}(\mu_1, \mu_2).
\end{aligned}$$

□

*Proof of Theorem 3.2.* We denote by  $(\text{ET}^{\mathbf{k}_1, \mathbf{k}_2})^*$  the Fenchel conjugate of  $\text{ET}^{\mathbf{k}_1, \mathbf{k}_2}$ , i.e.

$$(\text{ET}^{\mathbf{k}_1, \mathbf{k}_2})^*(\varphi_1, \varphi_2) := \sup_{\nu_1 \in \mathcal{M}(X_1), \nu_2 \in \mathcal{M}(X_2)} \left\{ \sum_{i=1}^2 \int \varphi_i d\nu_i(x_i) - \text{ET}^{\mathbf{k}_1, \mathbf{k}_2}(\nu_1, \nu_2) \right\},$$

for every  $\varphi_i \in C_b(X_i)$ ,  $i = 1, 2$ . By Lemma A.5 we get that

$$(\text{ET}^{\mathbf{k}_1, \mathbf{k}_2})^*(\varphi_1, \varphi_2) = \begin{cases} 0 & \text{if } (\varphi_1, \varphi_2) \in \Phi_E, \\ +\infty & \text{otherwise,} \end{cases}$$

where

$$\begin{aligned}
\Phi_E := \left\{ (\varphi_1, \varphi_2) \in C_b(X_1) \times C_b(X_2) : \sum_{i=1}^2 \int_{X_i} \varphi_i(x_i) d\nu_i(x_i) \leq \text{ET}^{\mathbf{k}_1, \mathbf{k}_2}(\nu_1, \nu_2) \right. \\
\left. \text{for every } (\nu_1, \nu_2) \in \mathcal{M}(X_1) \times \mathcal{M}(X_2) \right\}.
\end{aligned}$$

We now check that  $\Phi_J \subset \Phi_E$ . Let any  $(\varphi_1, \varphi_2) \in \Phi_J$ . Let  $\nu_i \in \mathcal{M}(X_i)$ ,  $i = 1, 2$ . If  $\mathcal{E}_C^{\mathbf{k}_1, \mathbf{k}_2}(\nu_1, \nu_2) = +\infty$  then it is clear that  $\sum_{i=1}^2 \int_{X_i} \varphi_i(x_i) d\nu_i(x_i) \leq \text{ET}^{\mathbf{k}_1, \mathbf{k}_2}(\nu_1, \nu_2)$ . Thus, we only consider  $\mathcal{E}_C^{\mathbf{k}_1, \mathbf{k}_2}(\nu_1, \nu_2) < +\infty$ . Applying Theorem 3.1 there exists  $\gamma \in \mathcal{M}(X_1 \times X_2)$  such that  $\mathcal{E}_C^{\mathbf{k}_1, \mathbf{k}_2}(\nu_1, \nu_2) = \text{ET}^{\mathbf{k}_1, \mathbf{k}_2}(\gamma | \nu_1, \nu_2)$ . Then, applying Lemma A.3 we get that

$$\begin{aligned}
&\text{ET}^{\mathbf{k}_1, \mathbf{k}_2}(\nu_1, \nu_2) \\
&= a_1 |(\nu_1 - \gamma_1)^+| + b_1 |(\gamma_1 - \nu_1)^+| + a_2 |(\nu_2 - \gamma_2)^+| + b_2 |(\gamma_2 - \nu_2)^+| + \int_{X_1} C(x_1, \gamma_{x_1}) d\gamma_1(x_1) \\
&\geq \int_{X_1} \varphi_1 d\nu_1 - \int_{X_1} J_1(\varphi_1) d\gamma_1 + \int_{X_2} \varphi_2 d\nu_2 - \int_{X_2} J_2(\varphi_2) d\gamma_2 + \int_{X_1} [J_1(\varphi_1(x_1)) + \gamma_{x_1}(J_2(\varphi_2))] d\gamma_1(x_1) \\
&= \int_{X_1} \varphi_1 d\nu_1 - \int_{X_1} J_1(\varphi_1) d\gamma_1 + \int_{X_2} \varphi_2 d\nu_2 - \int_{X_2} J_2(\varphi_2) d\gamma_2 + \int_{X_1} J_1(\varphi_1) d\gamma_1 + \\
&\quad + \int_{X_1} \int_{X_2} J_2(\varphi_2(x_2)) d\gamma_{x_1}(x_2) d\gamma_1(x_1) \\
&= \int_{X_1} \varphi_1 d\nu_1 + \int_{X_2} \varphi_2 d\nu_2 - \int_{X_2} J_2(\varphi_2) d\gamma_2 + \int_{X_2} J_2(\varphi_2(x_2)) d\gamma_2(x_2) \\
&= \int_{X_1} \varphi_1 d\nu_1 + \int_{X_2} \varphi_2 d\nu_2.
\end{aligned}$$

Therefore  $(\varphi_1, \varphi_2) \in \Phi_E$ . Hence  $\Phi_J \subset \Phi_E$ .

Now, let  $(\varphi_1, \varphi_2) \in \Phi_E$ . We will show that  $(\varphi_1, \varphi_2) \in \Phi_J$ . Denote by  $\eta$  the null measure on  $X_1 \times X_2$ . As  $(\varphi_1, \varphi_2) \in \Phi_E$ , for every  $(\nu_1, \nu_2) \in \mathcal{M}(X_1) \times \mathcal{M}(X_2)$  one has

$$\sum_{i=1}^2 \int_{X_i} \varphi_i(x_i) d\nu_i(x_i) \leq \text{ET}^{\mathbf{k}_1, \mathbf{k}_2}(\nu_1, \nu_2) \leq \mathcal{E}_C^{\mathbf{k}_1, \mathbf{k}_2}(\eta | \nu_1, \nu_2) = a_1 |\nu_1| + a_2 |\nu_2|.$$

For every  $z \in X_1$ , setting  $\nu_1 := \delta_z$  and  $\nu_2$  is the null measure on  $X_2$ , we obtain that  $\varphi_1(z) \leq a_1$ . Similarly, we also have  $\varphi_2 \leq a_2$  on  $X_2$ .

Let  $x_1 \in X_1$  and  $p \in \mathcal{P}(X_2)$ . Now we will prove that  $J_1(\varphi_1(x_1)) + p(J_2(\varphi_2)) \leq C(x_1, p)$ . For every  $r > 0$ , put  $\nu_1 := \delta_{x_1}$  and  $\gamma := r\delta_{x_1} \otimes p$ . Then for every  $\nu_2 \in \mathcal{M}(X_2)$ , we have

$$\begin{aligned} \varphi_1(x_1) + \int_{X_2} \varphi_2 d\nu_2 &= \sum_{i=1}^2 \int_{X_i} \varphi_i d\nu_i \\ &\leq \text{ET}^{\mathbf{k}_1, \mathbf{k}_2}(\nu_1, \nu_2) \\ &\leq \mathcal{E}_C^{\mathbf{k}_1, \mathbf{k}_2}(\gamma | \nu_1, \nu_2) \\ &= a_1(1-r)^+ + b_1(r-1)^+ + a_2|(\nu_2 - \gamma_2)^+| + b_2|(\gamma_2 - \nu_2)^+| + rC(x_1, p). \end{aligned}$$

Hence for all  $\nu_2 \in \mathcal{M}(X_2)$  we have

$$\frac{1}{r}[\varphi_1(x_1) - a_1(1-r)^+ - b_1(r-1)^+] \leq \frac{1}{r} \left[ a_2|(\nu_2 - \gamma_2)^+| + b_2|(\gamma_2 - \nu_2)^+| - \int_{X_2} \varphi_2 d\nu_2 \right] + C(x_1, p),$$

We define  $A := \varphi_2^{-1}([-b_2, a_2])$  and  $B := \varphi_2^{-1}(-\infty, -b_2) = X_2 \setminus A$ , and the Borel bounded function  $f : X_2 \rightarrow [0, 1]$  by

$$f(x) := \begin{cases} 1 & \text{if } x \in A, \\ 0 & \text{otherwise.} \end{cases}$$

Put  $\nu_2 = f\gamma_2$ . As  $J_2(\varphi_2(x)) = \begin{cases} \varphi_2(x) & \text{if } x \in A, \\ -b_2 & \text{if } x \in B, \end{cases}$  we get that

$$\begin{aligned} a_2|(\nu_2 - \gamma_2)^+| + b_2|(\gamma_2 - \nu_2)^+| - \int_{X_2} \varphi_2 d\nu_2 &= b_2 \int_{X_2} (1-f) d\gamma_2 - \int_{X_2} \varphi_2 f d\gamma_2 \\ &= b_2 \int_B d\gamma_2 - \int_A \varphi_2 d\gamma_2 \\ &= \int_{X_2} -J_2(\varphi_2) d\gamma_2. \end{aligned}$$

Hence for every  $r > 0$  we have

$$\begin{aligned} \frac{1}{r}[\varphi_1(x_1) - a_1(1-r)^+ - b_1(r-1)^+] &\leq -\frac{1}{r} \int_{X_2} J_2(\varphi_2) d\gamma_2 + C(x_1, p) \\ &= C(x_1, p) - p(J_2(\varphi_2)). \end{aligned}$$

Therefore, for every  $x_1 \in X_1$ ,  $p \in \mathcal{P}(X_2)$ , we get

$$J_1(\varphi_1(x_1)) = \sup_{r>0} \frac{\varphi_1(x_1) - a_1(1-r)^+ - b_1(r-1)^+}{r} \leq C(x_1, p) - p(J_2(\varphi_2)).$$

This implies that  $\Phi_E \subset \Phi_J$ . Hence  $\Phi_E = \Phi_J$ .

Now we are ready to prove our duality formula. Moreover, by Lemma A.5 one has  $\text{ET}^{\mathbf{k}_1, \mathbf{k}_2}$  is convex and lower semi-continuous. Hence, applying [27, Proposition 3.1, page 14 and Proposition 4.1, page 18] we get that  $(\text{ET}^{\mathbf{k}_1, \mathbf{k}_2})^{**} = \text{ET}^{\mathbf{k}_1, \mathbf{k}_2}$ . Therefore, applying Lemma A.4, we get

$$\begin{aligned} \text{ET}^{\mathbf{k}_1, \mathbf{k}_2}(\mu_1, \mu_2) &= \sup_{(\varphi_1, \varphi_2) \in C_b(X_1) \times C_b(X_2)} \left\{ \sum_{i=1}^2 \int_{X_i} \varphi_i(x_i) d\mu_i(x_i) - (\text{ET}^{\mathbf{k}_1, \mathbf{k}_2})^*(\varphi_1, \varphi_2) \right\} \\ &= \sup_{(\varphi_1, \varphi_2) \in \Phi_E} \sum_{i=1}^2 \int_{X_i} \varphi_i(x_i) d\mu_i(x_i) \\ &= \sup_{(\varphi_1, \varphi_2) \in \Phi_J} \sum_{i=1}^2 \int_{X_i} \varphi_i(x_i) d\mu_i(x_i) \\ &= \sup_{(\varphi_1, \varphi_2) \in \Phi_I} \sum_{i=1}^2 \int_{X_i} I_i(\varphi_i(x_i)) d\mu_i(x_i). \end{aligned}$$

□

#### A.4 Proof of Corollary 3.1

*Proof of Corollary 3.1.* We define  $C : X_1 \times \mathcal{P}(X_2) \rightarrow (-\infty, +\infty]$  by  $C(x_1, p) := k \int_{X_2} c(x_1, x_2) dp(x_2)$  for every  $x_1 \in X_1, p \in \mathcal{P}(X_2)$ . Then  $C$  is bounded from below,  $\frac{b_1}{2} + \frac{b_2}{2} + \inf C > 0$ , and  $C(x_1, \cdot)$  is convex for every  $x_1 \in X_1$ . Applying [22, Lemma 14], we get that  $C$  is lower semicontinuous. From Example A.1-A.3, we also have that  $C$  has property (T).

Now we prove that  $\Phi_I = \Lambda_I$ . For every  $(\varphi_1, \varphi_2) \in \Phi_I, x_1 \in X_1, x_2 \in X_2$  we have

$$\begin{aligned} \varphi_1(x_1) + \varphi_2(x_2) &= \varphi_1(x_1) + \delta_{x_2}(\varphi_2) \\ &= \int_{X_2} (\varphi_1(x_1) + \varphi_2(y)) d\delta_{x_2}(y) \\ &\leq \int_{X_2} k \cdot c(x_1, y) d\delta_{x_2}(y) \\ &= k \cdot c(x_1, x_2). \end{aligned}$$

Hence  $\Phi_I \subset \Lambda_I$ . On the other hand, for every  $(\varphi_1, \varphi_2) \in \Lambda_I, x_1 \in X_1, p \in \mathcal{P}(X_2)$ , we have

$$\begin{aligned} \varphi_1(x_1) + p(\varphi_2) &= \int_{X_2} (\varphi_1(x_1) + \varphi_2(y)) dp(y) \\ &\leq \int_{X_2} k \cdot c(x_1, y) dp(y) \\ &= C(x_1, p). \end{aligned}$$

Hence  $\Lambda_I \subset \Phi_I$ , and therefore  $\Phi_I = \Lambda_I$ . Similarly, we also have  $\Phi_J = \Lambda_J$ . Applying Theorem 3.2, we get the result.  $\square$

#### A.5 Proof of Theorem 3.3

*Proof of Theorem 3.3.* Applying Corollary 3.1 we have

$$\begin{aligned} \mathcal{E}^{\mathbf{k}_1, \mathbf{k}_2, k}(\mu_1, \mu_2) &= \sup \left\{ \int_{X_1} I_1(\varphi_1(x)) d\mu_1(x) + \int_{X_2} I_2(\varphi_2(y)) d\mu_2(y) : \varphi_i \in C_b(X_i), \right. \\ &\quad \left. \varphi_1(x) \geq -b_1, \varphi_2(y) \geq -b_2, \varphi_1(x) + \varphi_2(y) \leq k \cdot c(x, y), \forall x \in X_1, y \in X_2 \right\}. \end{aligned}$$

As  $\mu_2 = \sum_{i=1}^M m_i \delta_{y_i}$ , we get that

$$\begin{aligned} \mathcal{E}^{\mathbf{k}_1, \mathbf{k}_2, k}(\mu_1, \mu_2) &= \sup \left\{ \int_{X_1} I_1(\varphi_1(x)) d\mu(x) + \sum_{i=1}^M m_i I_2(w_i) : \varphi_1 \in C_b(X_1), \varphi_1(x) \geq -b_1, \right. \\ &\quad \left. w_i \geq -b_2, \varphi_1(x) + w_i \leq k \cdot c(x, y_i), \forall x \in X_1, i = 1, \dots, M \right\}. \end{aligned}$$

As  $c$  is lower semicontinuous and satisfies *radial* property (see Definition 3.2) with respect to  $\mu_1$ , we obtain that  $\{C_1(w), \dots, C_M(w), R\}$  is a  $\mu_1$ -measurable partition of  $X_1$ . Given  $n \in \mathbb{N}$  and  $w = (w_1, \dots, w_M) \in [-b_2, +\infty)^M$ , we define the map  $c_n^w : X_1 \rightarrow (-\infty, +\infty]$  by  $c_n^w(x) = \min\{n, c^w(x)\}$ . As  $c$  is measurable, so are  $c^w$  and  $c_n^w$ . Since  $\{c_n^w\}_{n \in \mathbb{N}}$  increases, converges pointwise to  $c^w$ ,  $I_1$  is continuous and increasing on  $[-b_1, +\infty)$ , and  $\lim_{s \rightarrow \infty} I_1(s) = a_1$ , we get that

$$\begin{aligned} \lim_{n \rightarrow \infty} \int_{X_1} I_1(c_n^w(x)) d\mu_1(x) &= \lim_{n \rightarrow \infty} \left[ \sum_{i=1}^M \int_{C_i(w)} I_1(c_n^w(x)) d\mu_1(x) + \int_R I_1(c_n^w(x)) d\mu_1(x) \right] \\ &= \sum_{i=1}^M \int_{C_i(w)} I_1(-b_1 \vee [k \cdot c(x, y_i) - w_i])(x) d\mu_1(x) + a_1 \mu_1(R). \end{aligned}$$

Therefore,

$$\mathcal{E}^{\mathbf{k}_1, \mathbf{k}_2, k}(\mu_1, \mu_2) = \sup \left\{ \mathcal{G}(w) : w = (w_1, \dots, w_M) \in [-b_2, +\infty)^M \right\}.$$

□

### A.6 Proof of Theorem 3.4

*Proof of Theorem 3.4.* Put  $B_i = X_1 \times \{y_i\}$ ,  $i = 1, \dots, M$ . Then  $\{B_i : i = 1, \dots, M\}$  is a measurable partition of  $X_1 \times X_2$  and hence we can write  $\gamma = \sum_{i=1}^M \eta_i \otimes \delta_{y_i}$  for  $\eta_i \in \mathcal{M}(X_1)$ ,  $i = 1, \dots, M$ . Put  $f = \frac{d\gamma_1}{d\mu_1}$ . As  $\mathcal{E}^{\mathbf{k}_1, \mathbf{k}_2, k}(\gamma|\mu_1, \mu_2) < \infty$  we get  $\int_{X_1 \times X_2} cd\gamma < \infty$  and hence  $\gamma_1(R) = 0$ . Therefore  $\int_R fd\mu_1 = 0$ , i.e.,  $f(x) = 0$  for  $\mu_1$ -a.e.  $x \in R$ . The Lebesgue decomposition of  $\gamma_2 = \pi_{2\#}\gamma$  with respect to  $\mu_2$  is  $\gamma_2 = \sum_{i \in S_1} |\eta_i| \delta_{x_i} + \gamma_2^\perp$ , where  $\gamma_2^\perp = \sum_{i \in S_2} |\eta_i| \delta_{x_i}$ . Here  $\pi_{i\#}\gamma$  refers to the  $i$ th marginal of  $\gamma$ . We have

$$\begin{aligned} \mathcal{E}^{\mathbf{k}_1, \mathbf{k}_2, k}(\gamma|\mu_1, \mu_2) &= k \int_{X_1 \times \{y_1, \dots, y_M\}} cd\gamma + \int_{X_1} [a_1(1-f(x))^+ + b_1(f(x)-1)^+] d\mu_1(x) \\ &\quad + b_1 \gamma_1^\perp(X_1) + \sum_{i \in S_1} \left[ a_2 \left( 1 - \frac{|\eta_i|}{m_i} \right)^+ + b_2 \left( \frac{|\eta_i|}{m_i} - 1 \right)^+ \right] m_i + b_2 \sum_{i \in S_2} |\eta_i| \\ &= \sum_{i=1}^M k \int_{X_1 \setminus R} c(x, y_i) d\eta_i(x) + \int_{X_1 \setminus R} [a_1(1-f(x))^+ + b_1(f(x)-1)^+] d\mu_1(x) \\ &\quad + a_1 \mu(R) + b_1 \gamma_1^\perp(X_1) + \sum_{i \in S_1} \left[ a_2 \left( 1 - \frac{|\eta_i|}{m_i} \right)^+ + b_2 \left( \frac{|\eta_i|}{m_i} - 1 \right)^+ \right] m_i + b_2 \sum_{i \in S_2} |\eta_i|. \end{aligned}$$

On the other hand, for  $i = 1, 2$ , we have

$$a_i(1-s)^+ + b_i(s-1)^+ - I_i(\varphi) \geq \begin{cases} -sa_i & \text{if } \varphi > a_i, \\ -s\varphi & \text{if } -b_i \leq \varphi \leq a_i, \\ \infty & \text{otherwise.} \end{cases}$$

Hence  $a_i(1-s)^+ + b_i(s-1)^+ - I_i(\varphi) \geq -s\varphi$  for all  $s, \varphi$ . The inequality is an equality if and only if  $-b_i \leq \varphi$  and  $s = 1$ . Therefore, we get that

$$\begin{aligned} \mathcal{E}^{\mathbf{k}_1, \mathbf{k}_2, k}(\gamma|\mu_1, \mu_2) - \mathcal{G}(w) &= k \sum_{i=1}^M \int_{X_1 \setminus R} c(x, y_i) d\eta_i(x) + b_1 \gamma_1^\perp(X_1) + b_2 \sum_{i \in S_2} |\eta_i| \\ &\quad + \int_{X_1 \setminus R} \left[ a_1(1-f(x))^+ + b_1(f(x)-1)^+ - I_1(c^w(x)) \right] d\mu_1(x) \\ &\quad + \sum_{i \in S_1} \left[ a_2 \left( 1 - \frac{|\eta_i|}{m_i} \right)^+ + b_2 \left( \frac{|\eta_i|}{m_i} - 1 \right)^+ - I_2(w_i) \right] m_i \\ &\geq \sum_{i=1}^M \int_{X_1 \setminus R} c(x, y_i) d\eta_i(x) + b_1 \gamma_1^\perp(X_1) + b_2 \sum_{i \in S_2} |\eta_i| \\ &\quad - \int_{X_1 \setminus R} c^w(x) f d\mu_1(x) - \sum_{i \in S_1} |\eta_i| w_i \\ &= \sum_{i=1}^M \int_{X_1 \setminus R} \left[ kc(x, y_i) - w_i - c^w(x) \right] d\eta_i(x) + \int_{X_1 \setminus R} c^w(x) d\gamma_1^\perp(x) \\ &\quad + b_1 \gamma_1^\perp(X_1 \setminus R) + \sum_{i \in S_2} |\eta_i| w_i + b_2 \sum_{i \in S_2} |\eta_i| \\ &= \sum_{i=1}^M \int_{C_i(w)} \left[ kc(x, y_i) - w_i - c^w(x) \right] d\eta_i(x) + \int_{X_1 \setminus R} [c^w(x) + b_1] d\gamma_1^\perp(x) \end{aligned}$$

$$\begin{aligned}
& + \sum_{i \in S_2} |\eta_i| (w_i + b_2) \\
& \geq 0.
\end{aligned}$$

The first inequality is an equality if and only if  $\frac{d\gamma_1}{d\mu_1}(x) = f(x) = 1$  for  $\mu_1$ -a.e.  $x \in X_1 \setminus R$  and  $\frac{|\eta_i|}{m_i} = 1$  for all  $i \in S_1$ . The second inequality becomes equality if and only if  $\text{supp}\eta_i \subset C_i(w)$  and hence  $\eta_i = \gamma_1 \llcorner C_i(w)$  for  $i = 1, \dots, M$ ,  $c^w(x) = -b_1$  for  $\gamma_1^\perp$ -a.e.  $x \in X_1 \setminus R$ , and  $w_i = -b_2$  for every  $i \in S_2$ . Therefore, we get that  $\mathcal{E}^{\mathbf{k}_1, \mathbf{k}_2, k}(\gamma | \mu_1, \mu_2) - \mathcal{G}(w) = 0$  if and only if conditions (7-10) hold.  $\square$

### A.7 Proof of Proposition 3.1

*Proof of Proposition 3.1.* By Definition 3.3, we have  $c^w(x) = +\infty$  for any  $x \in R$ . By (3), for any  $x \in R$ , we have  $I_1(c^w(x)) = I_1(+\infty) = a_1$ . Thus,  $a_1 \mu_1(R) = \int_R I_1(c^w(x)) d\mu_1(x)$ . Combining this result with (6), we obtain

$$\mathcal{G}(w) = \int_{X_1} I_1(c^w(x)) d\mu_1(x) + \sum_{i=1}^M I_2(w_i) m_i.$$

By definition in (3),  $I_1$  is differentiable on  $(-b_1, a_1) \cup (a_1, +\infty)$ , such that  $\partial_x I_1(x) = 1$  on  $(-b_1, a_1)$  and  $\partial_x I_1(x) = 0$  on  $(a_1, +\infty)$ . Thus, for any  $x \in C_i(w)$ , it holds  $I_1(c^w(x)) = I_1((-b_1 \vee k \cdot c(x, y_i) - w_i))$ , and we can derive the derivatives

$$\partial_{w_i} I_1(c^w(x)) = \begin{cases} 0, & k \cdot c(x, y_i) - w_i \in (-\infty, b_1), \\ [-1, 0], & k \cdot c(x, y_i) - w_i \in \{b_1\}, \\ -1, & k \cdot c(x, y_i) - w_i \in (-b_1, a_1), \\ [-1, 0], & k \cdot c(x, y_i) - w_i \in \{a_1\}, \\ 0, & k \cdot c(x, y_i) - w_i \in (a_1, +\infty). \end{cases}$$

On the other hand, for any  $x \in C_i(w)$ , we have  $\partial_{w_j} I_1(c^w(x)) = 0$ , for any  $j \neq i$ . Therefore, by Lemma 3.8 of [15], *radial* property (see Definition 3.2) of cost function  $c$ , and the absolutely continuity of  $\mu_1$  with respect to Lebesgue measure, then

$$\partial_{w_i} \int_{\Omega} I_1(c^w(x)) d\mu_1(x) = -\mu_1(C_i(w) \cap \{x : k \cdot c(x, y_i) - w_i \in [-b_1, a_1]\}). \quad (17)$$

Similarly, by definition in (3), we know

$$\partial_{w_i} I_2(w_i) = \begin{cases} 1, & w_i \in (-b_2, a_2), \\ [0, 1], & w_i \in \{a_2\}, \\ 0, & w_i \in (a_2, +\infty). \end{cases}$$

Then the (sub-)gradient can be obtained as presented.  $\square$

### A.8 Proof of Theorem 3.5

Equations (7-10) show that continuous mass rearranges only within Laguerre cells, while the residual mass collapses into the remainder set  $R$ . This insight later underpins our quantization and pruning strategies. Plugging the optimality conditions of Theorem 3.4 back yields the following explicit primal form, facilitating comparison with classical semi-discrete OT.

**Corollary A.1 (Primal tessellation formulation).** *If there exists optimizers for (2) and (5), then*

$$\mathcal{E}^{\mathbf{k}_1, \mathbf{k}_2, k}(\mu_1, \mu_2) = \min \left\{ k \sum_{i=1}^M \int_{C_i(w)} c(x, y_i) d\gamma_1(x) + a_1 |(\mu_1 - \gamma_1)^+| + b_1 |(\gamma_1 - \mu_1)^+| + \right. \quad (18)$$

$$\left. \sum_{i \in S_1} \left[ a_2 \left( 1 - \frac{|\eta_i|}{m_i} \right)^+ + b_2 \left( \frac{|\eta_i|}{m_i} - 1 \right)^+ \right] m_i + b_2 \sum_{i \in S_2} |\eta_i| \middle| w \in [-b_2, +\infty)^M, \gamma_1 \in \mathcal{M}(X_1), \gamma_1 \llcorner R = 0 \right\},$$



where  $\eta_i = \gamma_1 \llcorner C_i(w)$ ,  $i = 1, \dots, M$ . If  $\gamma$  and  $w$  are optimizers for (2) and (5), then the first margin  $\gamma_1$  and  $w$  are optimizers for (18). Conversely, if  $\gamma_1$  and  $w$  are optimizers for (18), then  $\gamma$  defined by (7) is the optimizer for (2).

*Proof.* For any choice of  $w \in [-b_2, +\infty)^M$ ,  $\gamma_1 \in \mathcal{M}(X_1)$ , and  $\gamma_1 \llcorner R = 0$ , define  $\gamma = \sum_{i=1}^M \gamma_1 \llcorner C_i(w) \otimes \delta_{y_i} \in \mathcal{M}(X_1 \times X_2)$ . The right-hand side of (18) can be written in the same form as (2) where the admissible set for  $\gamma$  is restricted to a subset such that  $\gamma$  takes the form  $\gamma = \sum_{i=1}^M \gamma_1 \llcorner C_i(w) \otimes \delta_{y_i}$ . Therefore, the right-hand side of (18) is no less than  $\mathcal{E}^{\mathbf{k}_1, \mathbf{k}_2, k}(\mu_1, \mu_2)$ . On the other hand, by Theorem 3.4, if  $\gamma^* = \sum_{i=1}^M \eta_i \otimes \delta_{y_i}$  and  $w^* \in [-b_2, +\infty)^M$  are taken to be the optimizers for (2) and (5), respectively, then they should satisfy (7-10), which leads to  $\eta_i = \gamma_1^* \llcorner C_i(w)$ ,  $i = 1, \dots, M$ , and  $\gamma_1^* \llcorner R = 0$ , where  $\gamma_1^*$  is the first margin of  $\gamma^*$ . In this case, the right-hand side of (18) equals  $\mathcal{E}^{\mathbf{k}_1, \mathbf{k}_2, k}(\mu_1, \mu_2)$ , and  $\gamma_1^*$  and  $w^*$  are the optimizers for (18).

Conversely, if  $\gamma_1^*$  and  $w^*$  are optimizers for (18), then  $\gamma$  defined by (7) in terms of  $\gamma_1^*$  and  $w^*$  is the optimizer for (2).  $\square$

*Proof of Theorem 3.5.* Consider any fixed  $\{y_1, \dots, y_M\} \subset X_2$ . For any constant  $a \in \mathbb{R}$ , let  $C_i(a) := C_i((a, \dots, a))$ , where  $(a, \dots, a)$  is an  $M$ -dimensional vector. For every  $w \in [-b_2, +\infty)^M$ , we define

$$\mathcal{G}(w, m_1, \dots, m_M) := \int_{X_1 \setminus R} I_1(c^w(x)) d\mu_1(x) + a_1 \mu_1(R) + \sum_{i=1}^M I_2(w_i) m_i,$$

where  $c^w : X_1 \rightarrow (-\infty, +\infty]$  is defined by  $c^w(x) = \min\{k \cdot c(x, y_i) - w_i : i = 1, \dots, M\} \vee -b_1$ .

From Theorem 3.3 we get that

$$\mathcal{E}^{\mathbf{k}_1, \mathbf{k}_2, k}(\mu_1, \mu_2) \geq \mathcal{G}(\mathbf{0}, m_1, \dots, m_M).$$

As  $I_2(0) = 0$  we get that  $\mathcal{G}(\mathbf{0}, m_1, \dots, m_M) = \int_{X_1 \setminus R} I_1(c^{\mathbf{0}}(x)) d\mu_1(x) + a_1 \mu_1(R) =: \mathcal{G}(\mathbf{0})$  does not depend on  $m_1, \dots, m_M$ .

Let  $\mu_2^* = \sum_{i=1}^M m_i^* \delta_{y_i}$ . We define the measurable map  $f : X_1 \rightarrow \mathbb{R}$ , defined by  $f(x) = 1$  for  $\mu_1$ -a.e  $x \in X_1 \setminus R$  and  $f(x) = 0$  for  $\mu_1$ -a.e  $x \in R$ . Define  $\eta^* := f \mu_1 \in \mathcal{M}(X_1)$ ,  $\eta_i^* := \eta^* \llcorner C_i(\mathbf{0})$ , and  $\gamma^* := \sum_{i=1}^M \eta_i^* \otimes \delta_{y_i}$ . Then the Lebesgue decomposition of  $\gamma_1^*$  with respect to  $\mu_1$  is  $\gamma_1^* = \sum_{i=1}^M \eta_i^* = f \mu_1$ . Optimality conditions (10) is fulfilled. By Theorem 3.4, it holds that  $\mathcal{E}^{\mathbf{k}_1, \mathbf{k}_2, k}(\mu_1, \mu_2^*) = \mathcal{G}(\mathbf{0})$ . Hence  $Q(y_1, \dots, y_M) = \mathcal{G}(\mathbf{0})$ , i.e.

$$Q(y_1, \dots, y_M) = \sum_{i=1}^M \int_{C_i(\mathbf{0})} I_1(-b_1 \vee k \cdot c(x, y_i)) d\mu_1(x) + a_1 \mu_1(R).$$

$\square$

## A.9 Proof of Proposition 3.2

*Proof of Proposition 3.2.* Note that

$$Q(y_1, \dots, y_M) = \int_{X_1} I_1(c^{\mathbf{0}}(x)) d\mu_1(x).$$

By definition in (3), we know

$$\partial_x I_1(x) = \begin{cases} 1, & x \in (-b_1, a_1), \\ [0, 1], & x \in \{a_1\}, \\ 0, & x \in (a_1, +\infty). \end{cases}$$

Fix  $x \in C_i(\mathbf{0})$ , we have  $I_1(c^{\mathbf{0}}(x)) = I_1((-b_1 \vee k \cdot c(x, y_i)))$ , and its derivative is obtained by chain rule,

$$\nabla_{y_i} I_1(c^{\mathbf{0}}(x)) = \begin{cases} 0, & k \cdot c(x, y_i) \in (-\infty, b_1), \\ k \nabla_{y_i} c(x, y_i), & k \cdot c(x, y_i) \in (-b_1, a_1), \\ 0, & k \cdot c(x, y_i) \in (a_1, +\infty). \end{cases}$$

Besides,  $\nabla_{y_j} I_1(c^{\mathbf{0}}(x)) = 0$  for any  $j \neq i$ . Therefore,

$$\begin{aligned}\nabla_{y_i} Q(y_1, \dots, y_M) &= \int_{C_i(\mathbf{0})} k \nabla_{y_i} c(x, y_i) \mathbf{1}_{\{x: k \cdot c(x, y_i) \in (-b_1, a_1)\}} d\mu_1(x) \\ &= k \int_{C_i(\mathbf{0}) \cap \{\mathbf{x}: \mathbf{k} \cdot \mathbf{c}(\mathbf{x}, \mathbf{y}_i) \in (-\mathbf{b}_1, \mathbf{a}_1)\}} \nabla_{y_i} c(x, y_i) d\mu_1(x).\end{aligned}$$

□

## NeurIPS Paper Checklist

### 1. Claims

Question: Do the main claims made in the abstract and introduction accurately reflect the paper's contributions and scope?

Answer: [\[Yes\]](#)

Justification: The abstract outlines our study of an unbalanced weak optimal transport problem with total variation penalties and highlights the key contributions relative to existing literature. The introduction further elaborates on the scope and significance of our work through clearly structured bullet points, providing a detailed overview of the theoretical and practical advancements.

Guidelines:

- The answer NA means that the abstract and introduction do not include the claims made in the paper.
- The abstract and/or introduction should clearly state the claims made, including the contributions made in the paper and important assumptions and limitations. A No or NA answer to this question will not be perceived well by the reviewers.
- The claims made should match theoretical and experimental results, and reflect how much the results can be expected to generalize to other settings.
- It is fine to include aspirational goals as motivation as long as it is clear that these goals are not attained by the paper.

### 2. Limitations

Question: Does the paper discuss the limitations of the work performed by the authors?

Answer: [\[Yes\]](#)

Justification: Given the paper's primary focus on developing a rigorous theoretical framework and the associated space constraints, we clearly state at the beginning of Section 4 that the numerical examples are preliminary and illustrative in nature. While our general framework has broad potential for real-world applications, a more extensive exploration of specific use cases is left for future work.

Guidelines:

- The answer NA means that the paper has no limitation while the answer No means that the paper has limitations, but those are not discussed in the paper.
- The authors are encouraged to create a separate "Limitations" section in their paper.
- The paper should point out any strong assumptions and how robust the results are to violations of these assumptions (e.g., independence assumptions, noiseless settings, model well-specification, asymptotic approximations only holding locally). The authors should reflect on how these assumptions might be violated in practice and what the implications would be.
- The authors should reflect on the scope of the claims made, e.g., if the approach was only tested on a few datasets or with a few runs. In general, empirical results often depend on implicit assumptions, which should be articulated.
- The authors should reflect on the factors that influence the performance of the approach. For example, a facial recognition algorithm may perform poorly when image resolution is low or images are taken in low lighting. Or a speech-to-text system might not be used reliably to provide closed captions for online lectures because it fails to handle technical jargon.
- The authors should discuss the computational efficiency of the proposed algorithms and how they scale with dataset size.
- If applicable, the authors should discuss possible limitations of their approach to address problems of privacy and fairness.
- While the authors might fear that complete honesty about limitations might be used by reviewers as grounds for rejection, a worse outcome might be that reviewers discover limitations that aren't acknowledged in the paper. The authors should use their best

judgment and recognize that individual actions in favor of transparency play an important role in developing norms that preserve the integrity of the community. Reviewers will be specifically instructed to not penalize honesty concerning limitations.

### 3. Theory assumptions and proofs

Question: For each theoretical result, does the paper provide the full set of assumptions and a complete (and correct) proof?

Answer: [\[Yes\]](#)

Justification: All assumptions are stated explicitly at the beginning of Section 3 and reiterated in the statements of each theorem when necessary. Given the density of theoretical results, we present only the theorem statements in the main text for clarity, while full proofs are provided in the appendix.

Guidelines:

- The answer NA means that the paper does not include theoretical results.
- All the theorems, formulas, and proofs in the paper should be numbered and cross-referenced.
- All assumptions should be clearly stated or referenced in the statement of any theorems.
- The proofs can either appear in the main paper or the supplemental material, but if they appear in the supplemental material, the authors are encouraged to provide a short proof sketch to provide intuition.
- Inversely, any informal proof provided in the core of the paper should be complemented by formal proofs provided in appendix or supplemental material.
- Theorems and Lemmas that the proof relies upon should be properly referenced.

### 4. Experimental result reproducibility

Question: Does the paper fully disclose all the information needed to reproduce the main experimental results of the paper to the extent that it affects the main claims and/or conclusions of the paper (regardless of whether the code and data are provided or not)?

Answer: [\[Yes\]](#)

Justification: The experimental details and settings are provided in Subsections 4.1 and 4.2, as well as in the supplementary material. All experiments are designed to be easily reproducible.

Guidelines:

- The answer NA means that the paper does not include experiments.
- If the paper includes experiments, a No answer to this question will not be perceived well by the reviewers: Making the paper reproducible is important, regardless of whether the code and data are provided or not.
- If the contribution is a dataset and/or model, the authors should describe the steps taken to make their results reproducible or verifiable.
- Depending on the contribution, reproducibility can be accomplished in various ways. For example, if the contribution is a novel architecture, describing the architecture fully might suffice, or if the contribution is a specific model and empirical evaluation, it may be necessary to either make it possible for others to replicate the model with the same dataset, or provide access to the model. In general, releasing code and data is often one good way to accomplish this, but reproducibility can also be provided via detailed instructions for how to replicate the results, access to a hosted model (e.g., in the case of a large language model), releasing of a model checkpoint, or other means that are appropriate to the research performed.
- While NeurIPS does not require releasing code, the conference does require all submissions to provide some reasonable avenue for reproducibility, which may depend on the nature of the contribution. For example
  - (a) If the contribution is primarily a new algorithm, the paper should make it clear how to reproduce that algorithm.
  - (b) If the contribution is primarily a new model architecture, the paper should describe the architecture clearly and fully.

- (c) If the contribution is a new model (e.g., a large language model), then there should either be a way to access this model for reproducing the results or a way to reproduce the model (e.g., with an open-source dataset or instructions for how to construct the dataset).
- (d) We recognize that reproducibility may be tricky in some cases, in which case authors are welcome to describe the particular way they provide for reproducibility. In the case of closed-source models, it may be that access to the model is limited in some way (e.g., to registered users), but it should be possible for other researchers to have some path to reproducing or verifying the results.

## 5. Open access to data and code

Question: Does the paper provide open access to the data and code, with sufficient instructions to faithfully reproduce the main experimental results, as described in supplemental material?

Answer: [Yes]

Justification: The code is included in the supplementary material and will be made publicly available upon acceptance.

Guidelines:

- The answer NA means that paper does not include experiments requiring code.
- Please see the NeurIPS code and data submission guidelines (<https://nips.cc/public/guides/CodeSubmissionPolicy>) for more details.
- While we encourage the release of code and data, we understand that this might not be possible, so “No” is an acceptable answer. Papers cannot be rejected simply for not including code, unless this is central to the contribution (e.g., for a new open-source benchmark).
- The instructions should contain the exact command and environment needed to run to reproduce the results. See the NeurIPS code and data submission guidelines (<https://nips.cc/public/guides/CodeSubmissionPolicy>) for more details.
- The authors should provide instructions on data access and preparation, including how to access the raw data, preprocessed data, intermediate data, and generated data, etc.
- The authors should provide scripts to reproduce all experimental results for the new proposed method and baselines. If only a subset of experiments are reproducible, they should state which ones are omitted from the script and why.
- At submission time, to preserve anonymity, the authors should release anonymized versions (if applicable).
- Providing as much information as possible in supplemental material (appended to the paper) is recommended, but including URLs to data and code is permitted.

## 6. Experimental setting/details

Question: Does the paper specify all the training and test details (e.g., data splits, hyperparameters, how they were chosen, type of optimizer, etc.) necessary to understand the results?

Answer: [Yes]

Justification: Detailed experimental settings and hyperparameters are provided in Sections 4.1 and 4.2, as well as in the supplementary material.

Guidelines:

- The answer NA means that the paper does not include experiments.
- The experimental setting should be presented in the core of the paper to a level of detail that is necessary to appreciate the results and make sense of them.
- The full details can be provided either with the code, in appendix, or as supplemental material.

## 7. Experiment statistical significance

Question: Does the paper report error bars suitably and correctly defined or other appropriate information about the statistical significance of the experiments?

Answer: [No]

Justification: Our experiments are designed to illustrate the main theoretical results, which are primarily mathematical in nature. All experiment results support the validity of the explicit (sub)gradient formula employed in our optimization algorithm.

Guidelines:

- The answer NA means that the paper does not include experiments.
- The authors should answer "Yes" if the results are accompanied by error bars, confidence intervals, or statistical significance tests, at least for the experiments that support the main claims of the paper.
- The factors of variability that the error bars are capturing should be clearly stated (for example, train/test split, initialization, random drawing of some parameter, or overall run with given experimental conditions).
- The method for calculating the error bars should be explained (closed form formula, call to a library function, bootstrap, etc.)
- The assumptions made should be given (e.g., Normally distributed errors).
- It should be clear whether the error bar is the standard deviation or the standard error of the mean.
- It is OK to report 1-sigma error bars, but one should state it. The authors should preferably report a 2-sigma error bar than state that they have a 96% CI, if the hypothesis of Normality of errors is not verified.
- For asymmetric distributions, the authors should be careful not to show in tables or figures symmetric error bars that would yield results that are out of range (e.g. negative error rates).
- If error bars are reported in tables or plots, The authors should explain in the text how they were calculated and reference the corresponding figures or tables in the text.

#### 8. Experiments compute resources

Question: For each experiment, does the paper provide sufficient information on the computer resources (type of compute workers, memory, time of execution) needed to reproduce the experiments?

Answer: [Yes]

Justification: Yes, the experiments can be executed on a CPU with a runtime of approximately 2.5 seconds, as reported in Section 5.

Guidelines:

- The answer NA means that the paper does not include experiments.
- The paper should indicate the type of compute workers CPU or GPU, internal cluster, or cloud provider, including relevant memory and storage.
- The paper should provide the amount of compute required for each of the individual experimental runs as well as estimate the total compute.
- The paper should disclose whether the full research project required more compute than the experiments reported in the paper (e.g., preliminary or failed experiments that didn't make it into the paper).

#### 9. Code of ethics

Question: Does the research conducted in the paper conform, in every respect, with the NeurIPS Code of Ethics <https://neurips.cc/public/EthicsGuidelines>?

Answer: [Yes]

Justification: [NA]

Guidelines:

- The answer NA means that the authors have not reviewed the NeurIPS Code of Ethics.
- If the authors answer No, they should explain the special circumstances that require a deviation from the Code of Ethics.
- The authors should make sure to preserve anonymity (e.g., if there is a special consideration due to laws or regulations in their jurisdiction).

## 10. Broader impacts

Question: Does the paper discuss both potential positive societal impacts and negative societal impacts of the work performed?

Answer: [NA]

Justification: This is a primarily theoretical work.

Guidelines:

- The answer NA means that there is no societal impact of the work performed.
- If the authors answer NA or No, they should explain why their work has no societal impact or why the paper does not address societal impact.
- Examples of negative societal impacts include potential malicious or unintended uses (e.g., disinformation, generating fake profiles, surveillance), fairness considerations (e.g., deployment of technologies that could make decisions that unfairly impact specific groups), privacy considerations, and security considerations.
- The conference expects that many papers will be foundational research and not tied to particular applications, let alone deployments. However, if there is a direct path to any negative applications, the authors should point it out. For example, it is legitimate to point out that an improvement in the quality of generative models could be used to generate deepfakes for disinformation. On the other hand, it is not needed to point out that a generic algorithm for optimizing neural networks could enable people to train models that generate Deepfakes faster.
- The authors should consider possible harms that could arise when the technology is being used as intended and functioning correctly, harms that could arise when the technology is being used as intended but gives incorrect results, and harms following from (intentional or unintentional) misuse of the technology.
- If there are negative societal impacts, the authors could also discuss possible mitigation strategies (e.g., gated release of models, providing defenses in addition to attacks, mechanisms for monitoring misuse, mechanisms to monitor how a system learns from feedback over time, improving the efficiency and accessibility of ML).

## 11. Safeguards

Question: Does the paper describe safeguards that have been put in place for responsible release of data or models that have a high risk for misuse (e.g., pretrained language models, image generators, or scraped datasets)?

Answer: [NA]

Justification: [NA]

Guidelines:

- The answer NA means that the paper poses no such risks.
- Released models that have a high risk for misuse or dual-use should be released with necessary safeguards to allow for controlled use of the model, for example by requiring that users adhere to usage guidelines or restrictions to access the model or implementing safety filters.
- Datasets that have been scraped from the Internet could pose safety risks. The authors should describe how they avoided releasing unsafe images.
- We recognize that providing effective safeguards is challenging, and many papers do not require this, but we encourage authors to take this into account and make a best faith effort.

## 12. Licenses for existing assets

Question: Are the creators or original owners of assets (e.g., code, data, models), used in the paper, properly credited and are the license and terms of use explicitly mentioned and properly respected?

Answer: [NA]

Justification: [NA]

Guidelines:

- The answer NA means that the paper does not use existing assets.
- The authors should cite the original paper that produced the code package or dataset.
- The authors should state which version of the asset is used and, if possible, include a URL.
- The name of the license (e.g., CC-BY 4.0) should be included for each asset.
- For scraped data from a particular source (e.g., website), the copyright and terms of service of that source should be provided.
- If assets are released, the license, copyright information, and terms of use in the package should be provided. For popular datasets, [paperswithcode.com/datasets](https://paperswithcode.com/datasets) has curated licenses for some datasets. Their licensing guide can help determine the license of a dataset.
- For existing datasets that are re-packaged, both the original license and the license of the derived asset (if it has changed) should be provided.
- If this information is not available online, the authors are encouraged to reach out to the asset's creators.

### 13. **New assets**

Question: Are new assets introduced in the paper well documented and is the documentation provided alongside the assets?

Answer: [NA]

Justification: [NA]

Guidelines:

- The answer NA means that the paper does not release new assets.
- Researchers should communicate the details of the dataset/code/model as part of their submissions via structured templates. This includes details about training, license, limitations, etc.
- The paper should discuss whether and how consent was obtained from people whose asset is used.
- At submission time, remember to anonymize your assets (if applicable). You can either create an anonymized URL or include an anonymized zip file.

### 14. **Crowdsourcing and research with human subjects**

Question: For crowdsourcing experiments and research with human subjects, does the paper include the full text of instructions given to participants and screenshots, if applicable, as well as details about compensation (if any)?

Answer: [NA]

Justification: [NA]

Guidelines:

- The answer NA means that the paper does not involve crowdsourcing nor research with human subjects.
- Including this information in the supplemental material is fine, but if the main contribution of the paper involves human subjects, then as much detail as possible should be included in the main paper.
- According to the NeurIPS Code of Ethics, workers involved in data collection, curation, or other labor should be paid at least the minimum wage in the country of the data collector.

### 15. **Institutional review board (IRB) approvals or equivalent for research with human subjects**

Question: Does the paper describe potential risks incurred by study participants, whether such risks were disclosed to the subjects, and whether Institutional Review Board (IRB) approvals (or an equivalent approval/review based on the requirements of your country or institution) were obtained?

Answer: [NA]

Justification: [NA]



Guidelines:

- The answer NA means that the paper does not involve crowdsourcing nor research with human subjects.
- Depending on the country in which research is conducted, IRB approval (or equivalent) may be required for any human subjects research. If you obtained IRB approval, you should clearly state this in the paper.
- We recognize that the procedures for this may vary significantly between institutions and locations, and we expect authors to adhere to the NeurIPS Code of Ethics and the guidelines for their institution.
- For initial submissions, do not include any information that would break anonymity (if applicable), such as the institution conducting the review.

**16. Declaration of LLM usage**

Question: Does the paper describe the usage of LLMs if it is an important, original, or non-standard component of the core methods in this research? Note that if the LLM is used only for writing, editing, or formatting purposes and does not impact the core methodology, scientific rigorousness, or originality of the research, declaration is not required.

Answer: [NA]

Justification: [NA]

Guidelines:

- The answer NA means that the core method development in this research does not involve LLMs as any important, original, or non-standard components.
- Please refer to our LLM policy (<https://neurips.cc/Conferences/2025/LLM>) for what should or should not be described.
